# Supplementary material for: The Influence of Glycosylation of Natural and Synthetic Prenylated Flavonoids on Binding to Human Serum Albumin and Inhibition of Cyclooxygenases COX-1 and COX-2
Source: PubMed Central journal article supplement (PMC6152009; doi:10.3390/molecules22071230), 2017-07-21

## Supplementary data

### The influence of glycosylation of natural and synthetic prenylated flavonoids on binding to human serum albumin and inhibition of cyclooxygenases COX-1 and COX-2

Tomasz Tronina\*<sup>1</sup>, Paulina Strugała<sup>2</sup>, Jarosław Popłoński<sup>1</sup>, Aleksandra Włoch<sup>2</sup>, Sandra Sordon<sup>1</sup>, Agnieszka Bartmańska<sup>1</sup> and Ewa Huszcza<sup>1</sup>

<sup>1</sup>Department of Chemistry, Wrocław University of Environmental and Life Sciences, Norwida 25, 50-375 Wrocław, Poland. <sup>2</sup>Department of Physics and Biophysics, Wrocław University of Environmental and Life Sciences, Norwida 25, 50-375 Wrocław, Poland.

\*Corresponding Author: E-mail address: tomasz.tronina@upwr.edu.pl, Phone: +48 713205197; fax: +48 3207744

| <b>Table of Contents:</b>                                                                                                                                                 | <b>Page</b> |
|---------------------------------------------------------------------------------------------------------------------------------------------------------------------------|-------------|
| <i><sup>1</sup>H NMR spectrum of <math>\alpha,\beta</math>-dihydroxanthohumol (2)</i>                                                                                     | S2          |
| <i><sup>13</sup>C NMR and DEPT 135° spectra of <math>\alpha,\beta</math>-dihydroxanthohumol (2)</i>                                                                       | S2          |
| <i>UV spectra of xanthohumol (1) and (Z)-6,4'-dihydroxy-4-methoxy-7-prenylaurone (3)</i>                                                                                  | S3          |
| <i>HRMS spectrum of (Z)-6,4'-dihydroxy-4-methoxy-7-prenylaurone (3)</i>                                                                                                   | S3          |
| <i><sup>1</sup>H NMR spectra of xanthohumol (1) and (Z)-6,4'-dihydroxy-4-methoxy-7-prenylaurone (3)</i>                                                                   | S4          |
| <i>Fragments of <sup>1</sup>H NMR spectra of xanthohumol (1) and (Z)-6,4'-dihydroxy-4-methoxy-7-prenylaurone (3)</i>                                                      | S5          |
| <i><sup>13</sup>C NMR spectra of xanthohumol (1) and (Z)-6,4'-dihydroxy-4-methoxy-7-prenylaurone (3)</i>                                                                  | S6          |
| <i><sup>1</sup>H-<sup>1</sup>H NMR (COSY) spectrum of (Z)-6,4'-dihydroxy-4-methoxy-7-prenylaurone (3)</i>                                                                 | S7          |
| <i><sup>1</sup>H-<sup>13</sup>C NMR (HSQC) spectrum of (Z)-6,4'-dihydroxy-4-methoxy-7-prenylaurone (3)</i>                                                                | S7          |
| <i>UV spectrum of <math>\alpha,\beta</math>-dihydroxanthohumol 4'-O-<math>\beta</math>-D-glucopyranoside (6)</i>                                                          | S8          |
| <i>HRMS spectrum of <math>\alpha,\beta</math>-dihydroxanthohumol 4'-O-<math>\beta</math>-D-glucopyranoside (6)</i>                                                        | S8          |
| <i><sup>1</sup>H NMR and <sup>13</sup>C NMR spectra of <math>\alpha,\beta</math>-dihydroxanthohumol 7-O-<math>\beta</math>-D-glucopyranoside (6)</i>                      | S9          |
| <i><sup>1</sup>H NMR - <sup>1</sup>H NMR (COSY) spectrum of <math>\alpha,\beta</math>-dihydroxanthohumol 7-O-<math>\beta</math>-D-glucopyranoside (6)</i>                 | S10         |
| <i><sup>1</sup>H NMR - <sup>13</sup>C NMR (HSQC) spectrum of <math>\alpha,\beta</math>-dihydroxanthohumol 7-O-<math>\beta</math>-D-glucopyranoside (6)</i>                | S10         |
| <i>UV spectrum of <math>\alpha,\beta</math>-dihydroxanthohumol 7-O-<math>\beta</math>-D-(4'''-O-methyl)glucopyranoside (7)</i>                                            | S11         |
| <i>HRMS spectrum of <math>\alpha,\beta</math>-dihydroxanthohumol 7-O-<math>\beta</math>-D-(4'''-O-methyl)glucopyranoside (7)</i>                                          | S11         |
| <i><sup>1</sup>H NMR and <sup>13</sup>C NMR spectra of <math>\alpha,\beta</math>-dihydroxanthohumol 7-O-<math>\beta</math>-D-(4'''-O-methyl)glucopyranoside (7)</i>       | S12         |
| <i><sup>1</sup>H NMR - <sup>1</sup>H NMR (COSY) spectrum of <math>\alpha,\beta</math>-dihydroxanthohumol 7-O-<math>\beta</math>-D-(4'''-O-methyl)glucopyranoside (7)</i>  | S13         |
| <i><sup>1</sup>H NMR - <sup>13</sup>C NMR (HSQC) spectrum of <math>\alpha,\beta</math>-dihydroxanthohumol 7-O-<math>\beta</math>-D-(4'''-O-methyl)glucopyranoside (7)</i> | S13         |
| <i>UV spectrum of (Z)-6,4'-dihydroxy-4-methoxy-7-prenylaurone 6-O-<math>\beta</math>-D-glucopyranoside (8)</i>                                                            | S14         |
| <i>HRMS spectrum of (Z)-6,4'-dihydroxy-4-methoxy-7-prenylaurone 6-O-<math>\beta</math>-D-glucopyranoside (8)</i>                                                          | S14         |
| <i><sup>1</sup>H NMR and <sup>13</sup>C NMR spectra of (Z)-6,4'-dihydroxy-4-methoxy-7-prenylaurone 6-O-<math>\beta</math>-D-glucopyranoside (8)</i>                       | S15         |
| <i><sup>1</sup>H NMR - <sup>1</sup>H NMR (COSY) spectrum of (Z)-6,4'-dihydroxy-4-methoxy-7-prenylaurone 6-O-<math>\beta</math>-D-glucopyranoside (8)</i>                  | S16         |
| <i><sup>1</sup>H NMR - <sup>13</sup>C NMR (HSQC) spectrum of (Z)-6,4'-dihydroxy-4-methoxy-7-prenylaurone 6-O-<math>\beta</math>-D-glucopyranoside (8)</i>                 | S16         |
| <i>UV spectrum of (Z)-6,4'-dihydroxy-4-methoxy-7-prenylaurone 6-O-<math>\beta</math>-D-(4'''-O-methyl)glucopyranoside (9)</i>                                             | S17         |
| <i>HRMS spectrum of (Z)-6,4'-dihydroxy-4-methoxy-7-prenylaurone 6-O-<math>\beta</math>-D-(4'''-O-methyl)glucopyranoside (9)</i>                                           | S17         |
| <i><sup>1</sup>H NMR and <sup>13</sup>C NMR spectra of (Z)-6,4'-dihydroxy-4-methoxy-7-prenylaurone 6-O-<math>\beta</math>-D-(4'''-O-methyl)glucopyranoside (9)</i>        | S18         |
| <i><sup>1</sup>H NMR - <sup>1</sup>H NMR (COSY) spectrum of (Z)-6,4'-dihydroxy-4-methoxy-7-prenylaurone 6-O-<math>\beta</math>-D-(4'''-O-methyl)glucopyranoside (9)</i>   | S19         |
| <i><sup>1</sup>H NMR - <sup>13</sup>C NMR (HSQC) spectrum of (Z)-6,4'-dihydroxy-4-methoxy-7-prenylaurone 6-O-<math>\beta</math>-D-(4'''-O-methyl)glucopyranoside (9)</i>  | S19         |

**Figure S1.**  $^1\text{H}$  NMR spectrum of  $\alpha,\beta$ -dihydroxanthohumol (**2**) (600 MHz,  $\text{CD}_3\text{OD}$ , Temp. 25  $^\circ\text{C}$ )

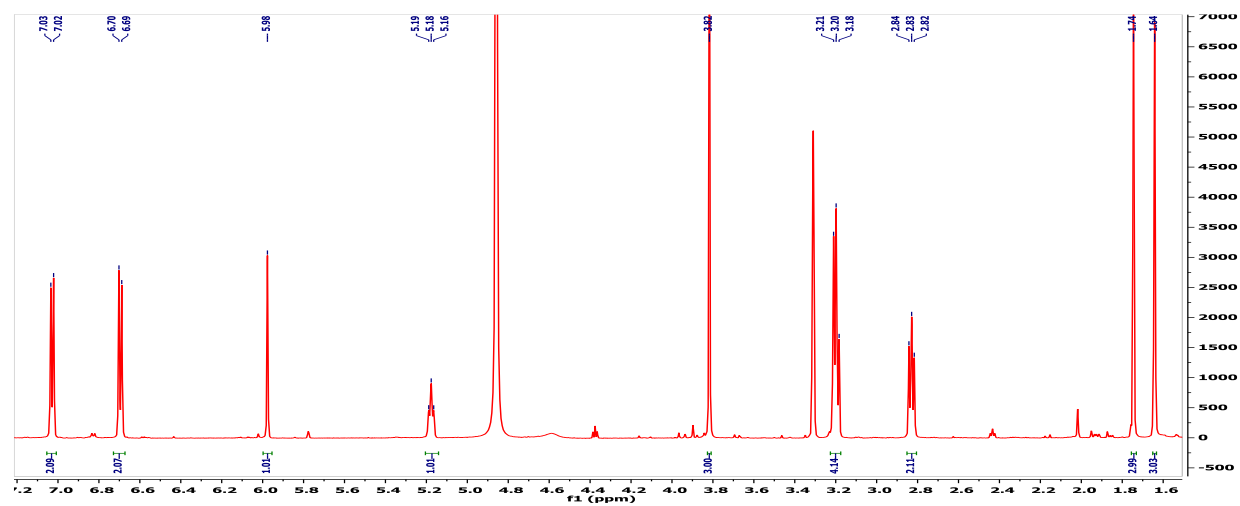

**Figure S2.**  $^{13}\text{C}$  NMR and DEPT 135 $^\circ$  spectra of  $\alpha,\beta$ -dihydroxanthohumol (**2**) (151 MHz,  $\text{CD}_3\text{OD}$ , Temp. 25  $^\circ\text{C}$ )

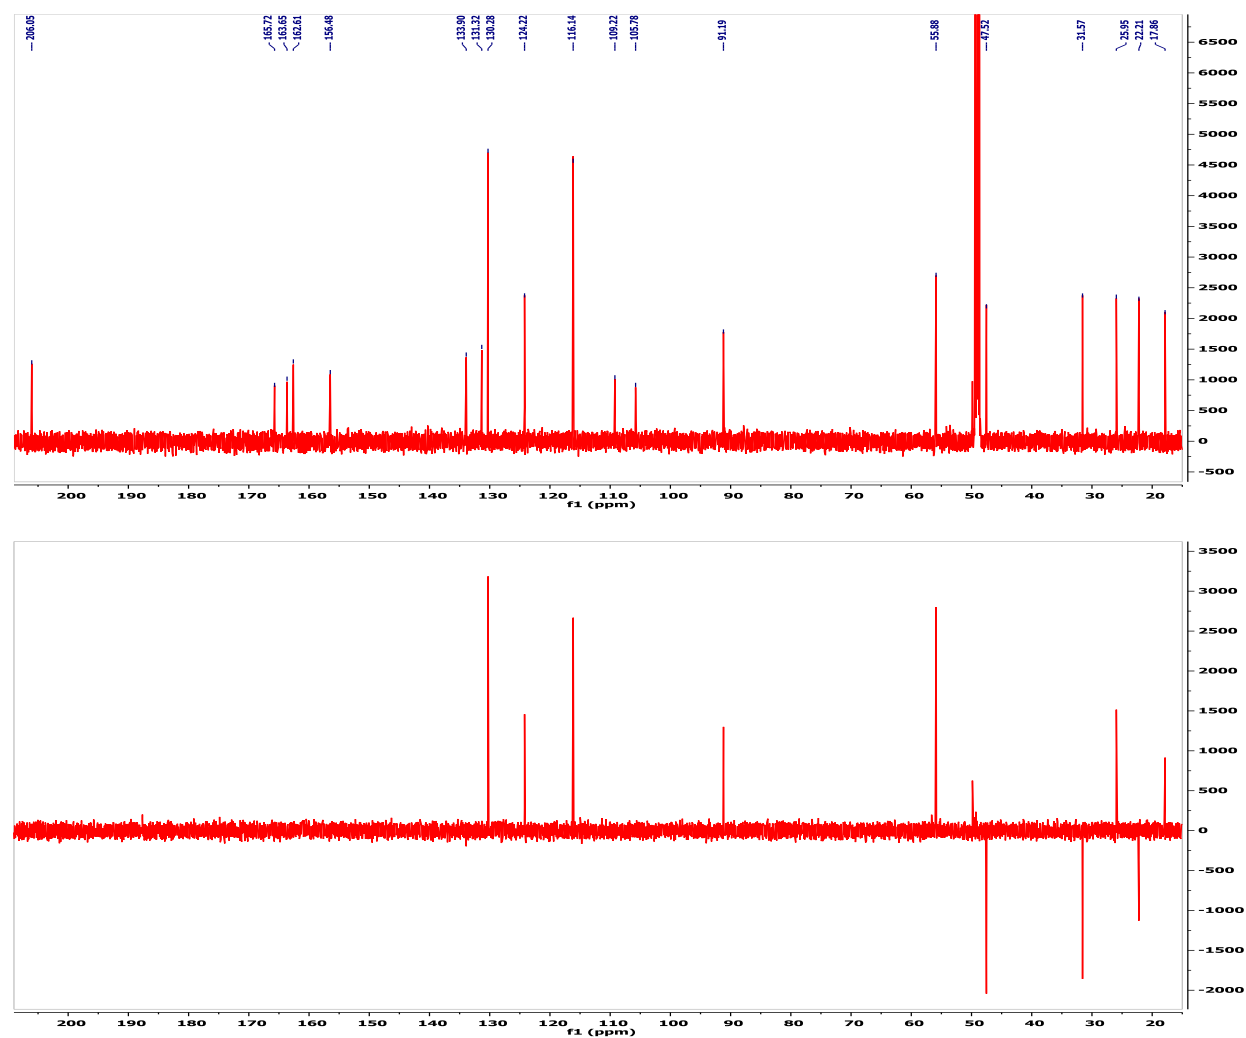

**Figure S3:** UV spectra of: **A** xanthohumol (**1**), **B** (Z)-6,4'-dihydroxy-4-methoxy-7-prenylaurone (**3**) (MeOH, Temp. 20 °C)

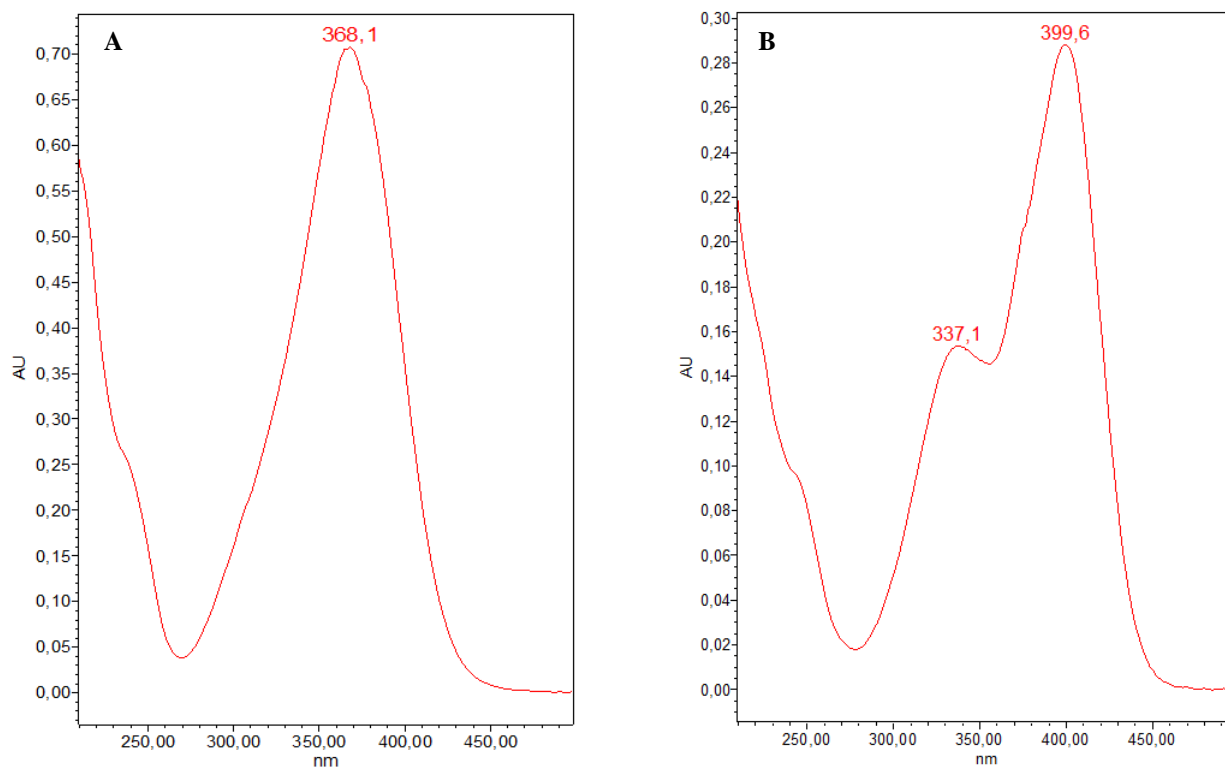

**Figure S4.** HRMS spectrum of (Z)-6,4'-dihydroxy-4-methoxy-7-prenylaurone (**3**)

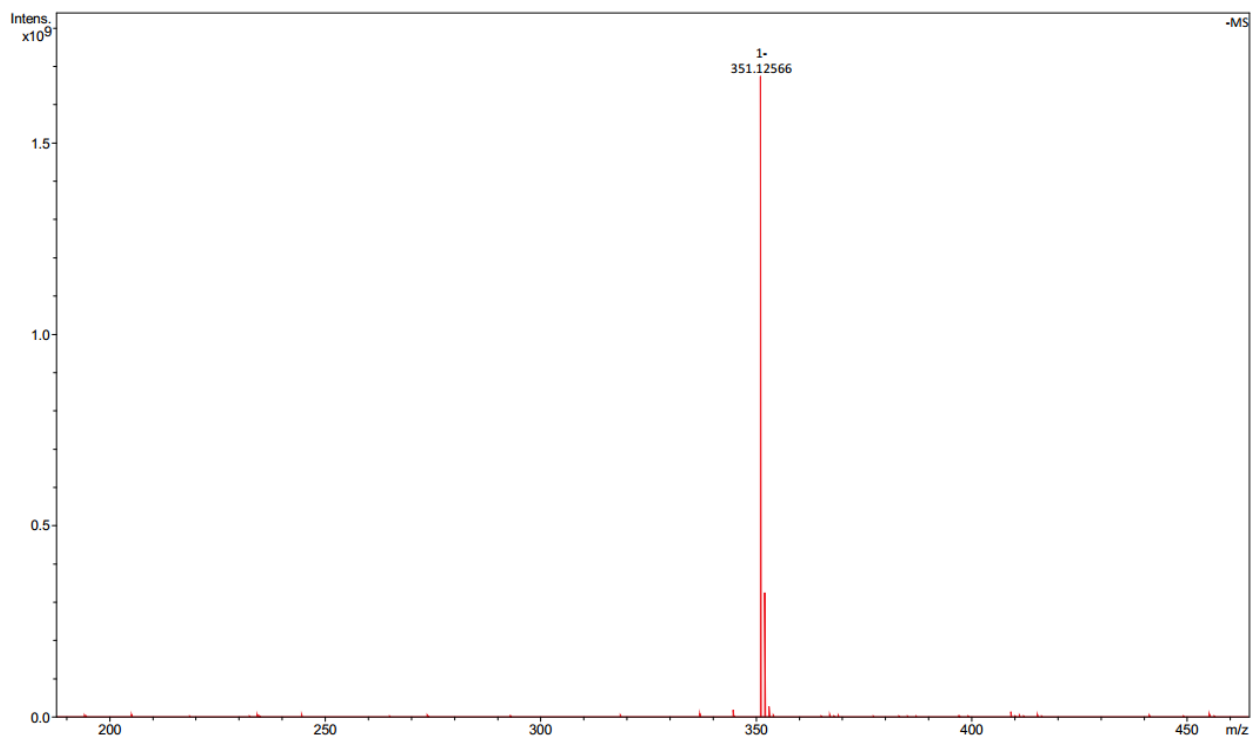

**Figure S5.**  $^1\text{H}$  NMR spectra of: **A** xanthohumol (**1**) (600 MHz,  $\text{DMSO-}d_6$ ), **B** (Z)-6,4'-dihydroxy-4-methoxy-7-prenylaurone (**3**) (300 MHz,  $\text{DMSO-}d_6$ , Temp. 25 °C)

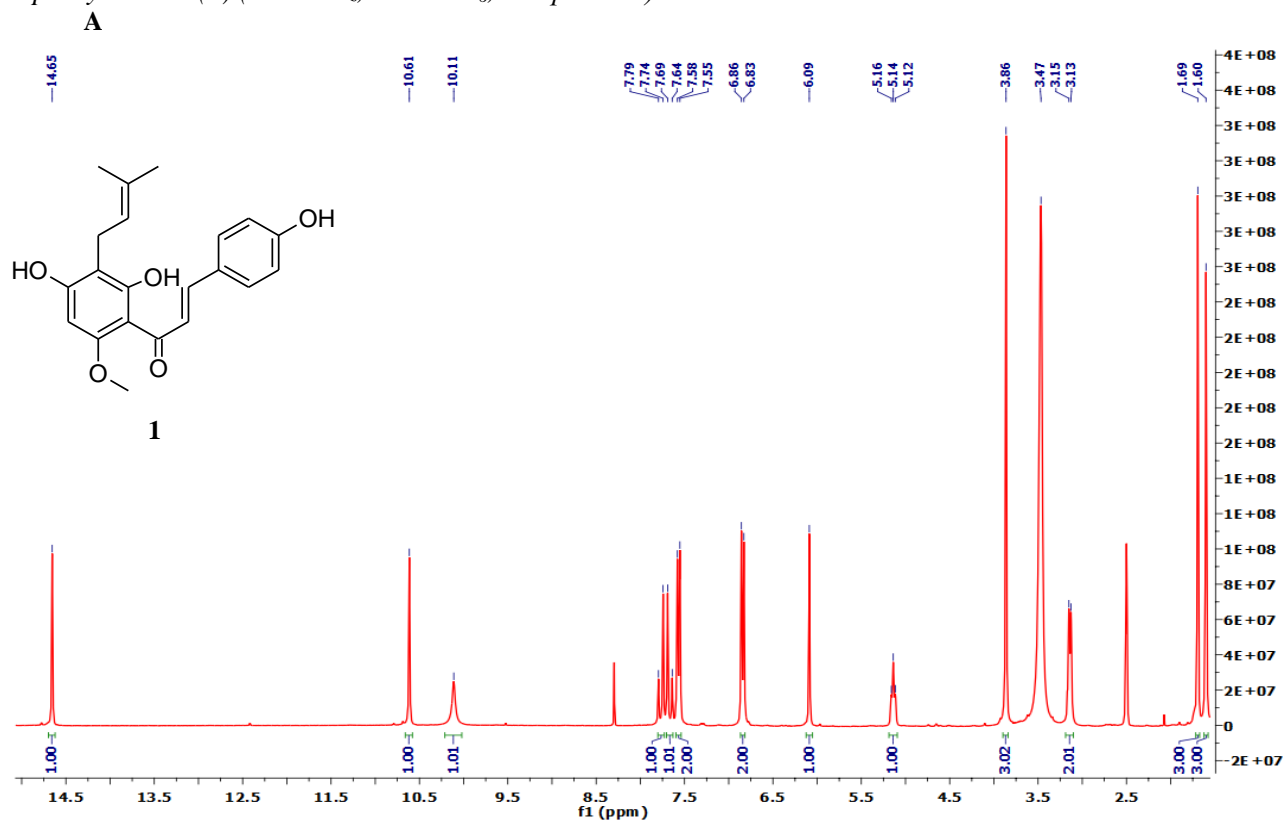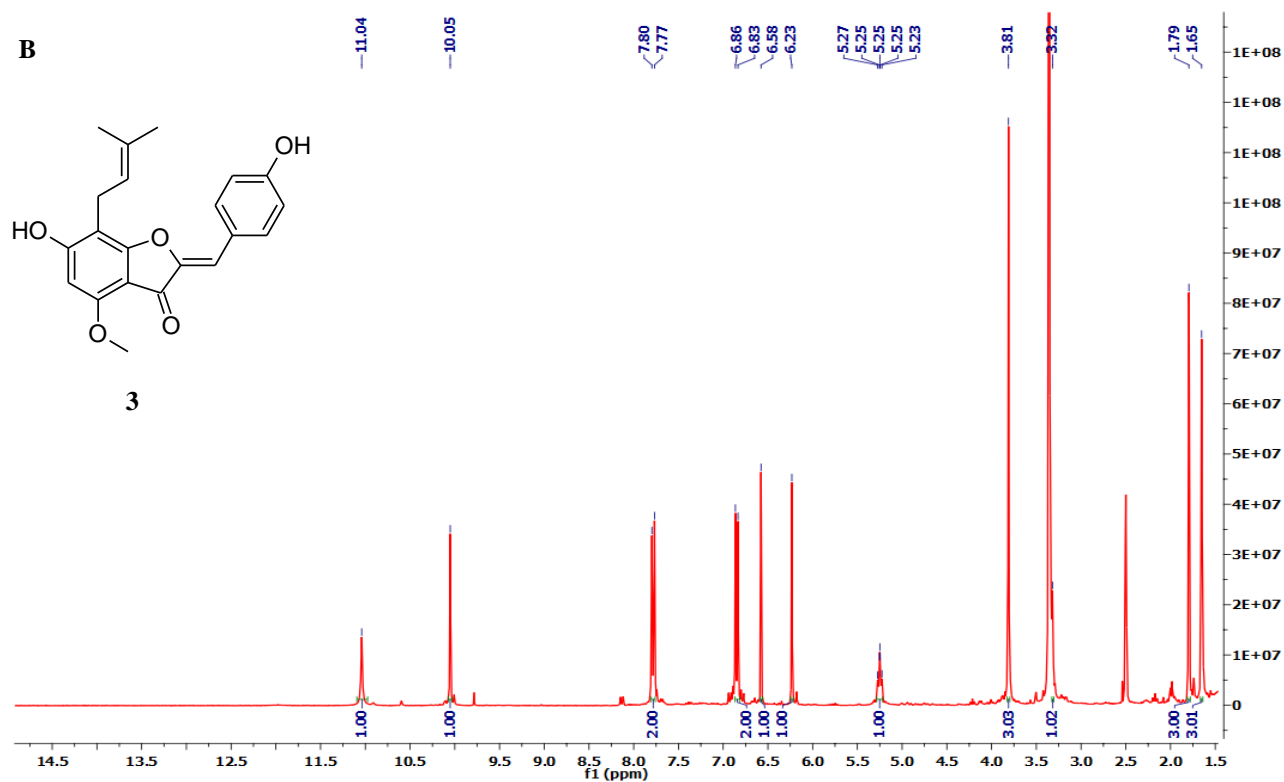

**Figure S6.** Fragments of  $^1\text{H}$  NMR spectra of: **A** xanthohumol (**1**) (600 MHz,  $\text{DMSO-}d_6$ ), **B** aurone (**3**) (300 MHz,  $\text{DMSO-}d_6$ , Temp. 25 °C)

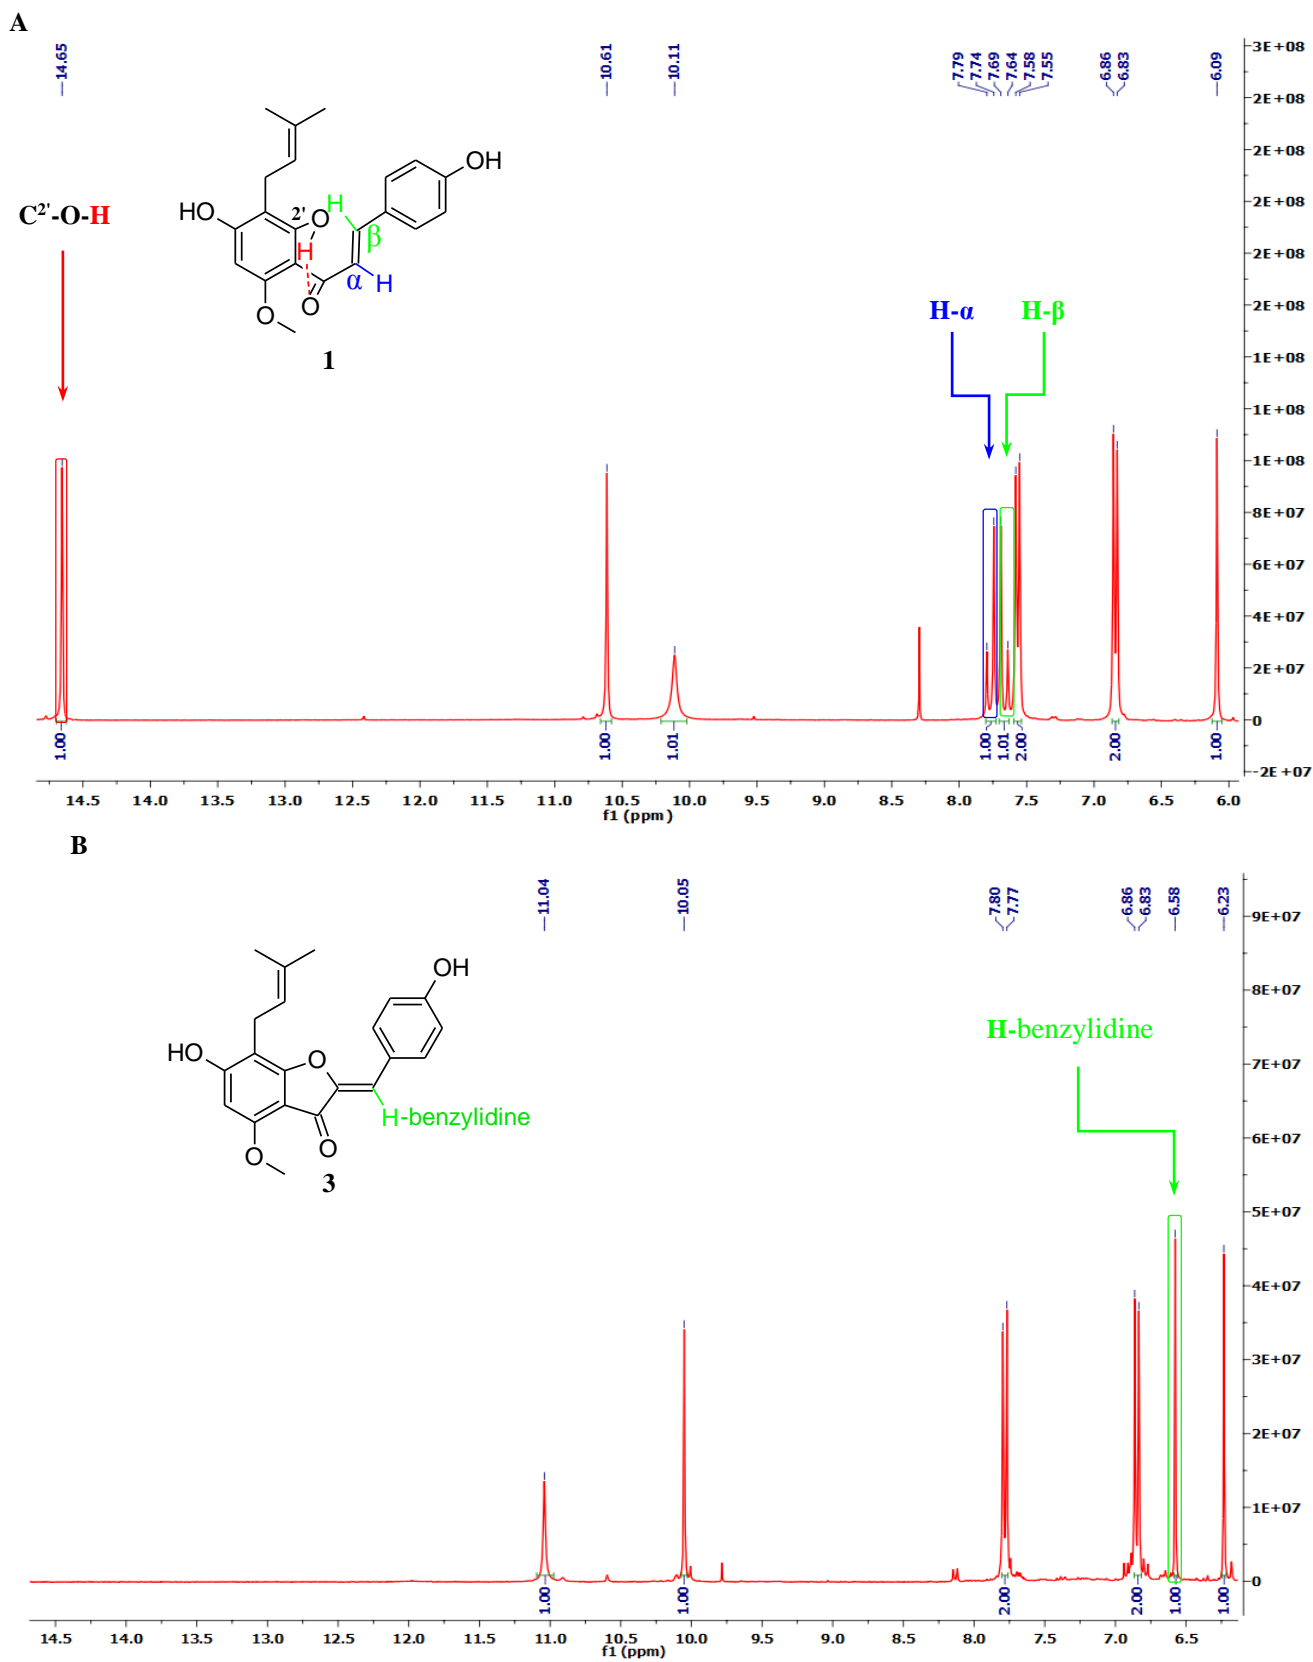

**Figure S7.**  $^{13}\text{C}$  NMR spectra of: **A** xanthohumol (**1**) (151 MHz,  $\text{DMSO-}d_6$ ), **B** auron (**3**) (75 MHz,  $\text{DMSO-}d_6$ , Temp. 25 °C)

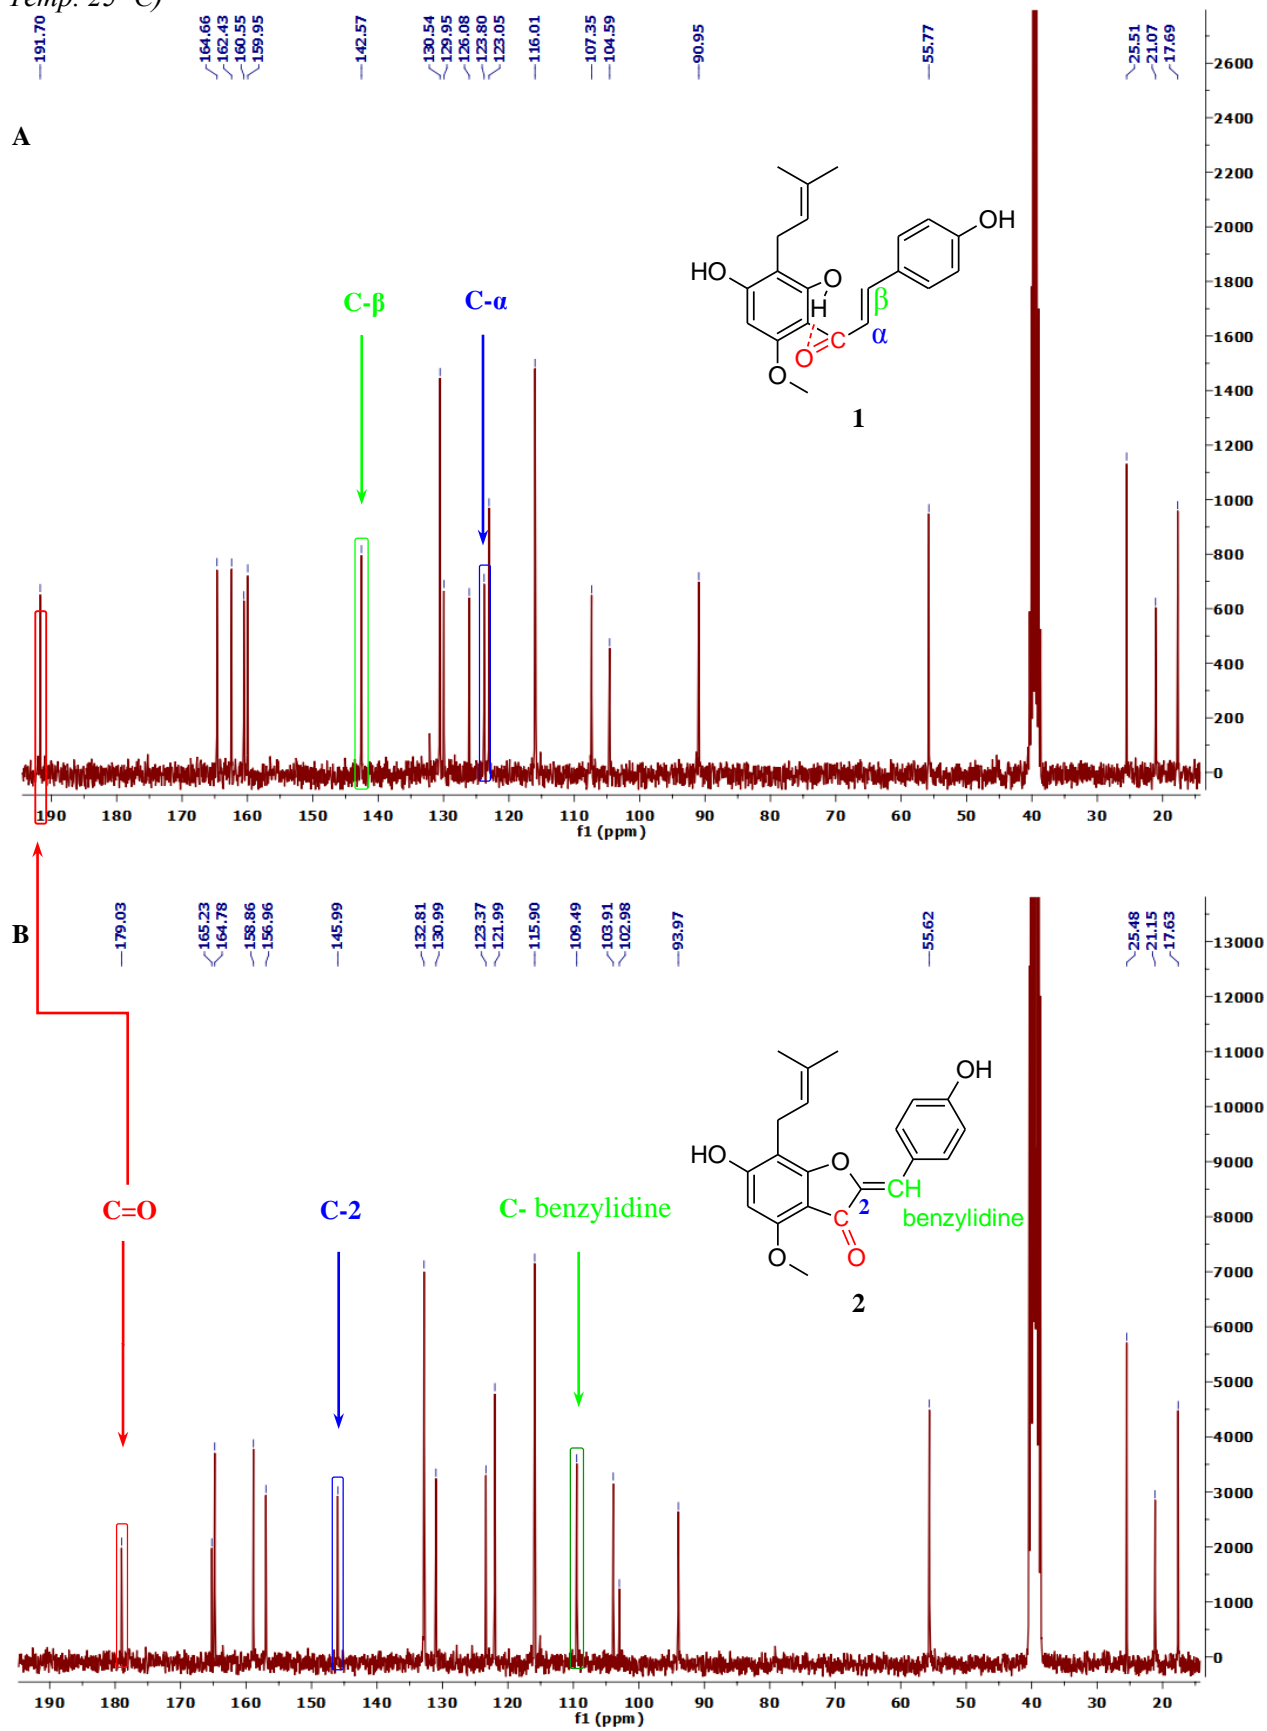

**Figure S8.**  $^1\text{H}$ - $^1\text{H}$  NMR (COSY) spectrum of (Z)-6,4'-dihydroxy-4-methoxy-7-prenylaurone (**3**) (300 MHz/300 MHz, DMSO- $d_6$ , Temp. 25 $^\circ$ )

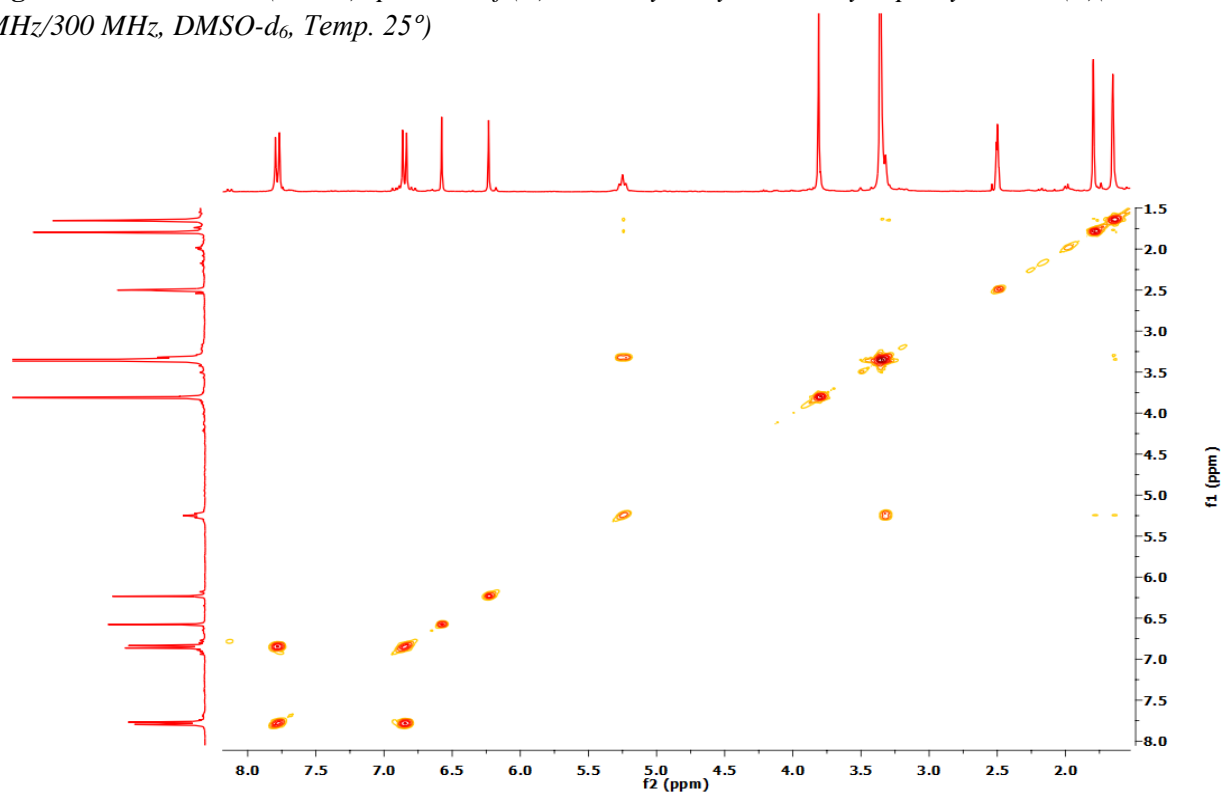

**Figure S9.**  $^1\text{H}$ - $^{13}\text{C}$  NMR (HSQC) spectrum of (Z)-6,4'-dihydroxy-4-methoxy-7-prenylaurone (**3**) (300 MHz/75 MHz, DMSO- $d_6$ , Temp. 25 $^\circ$ )

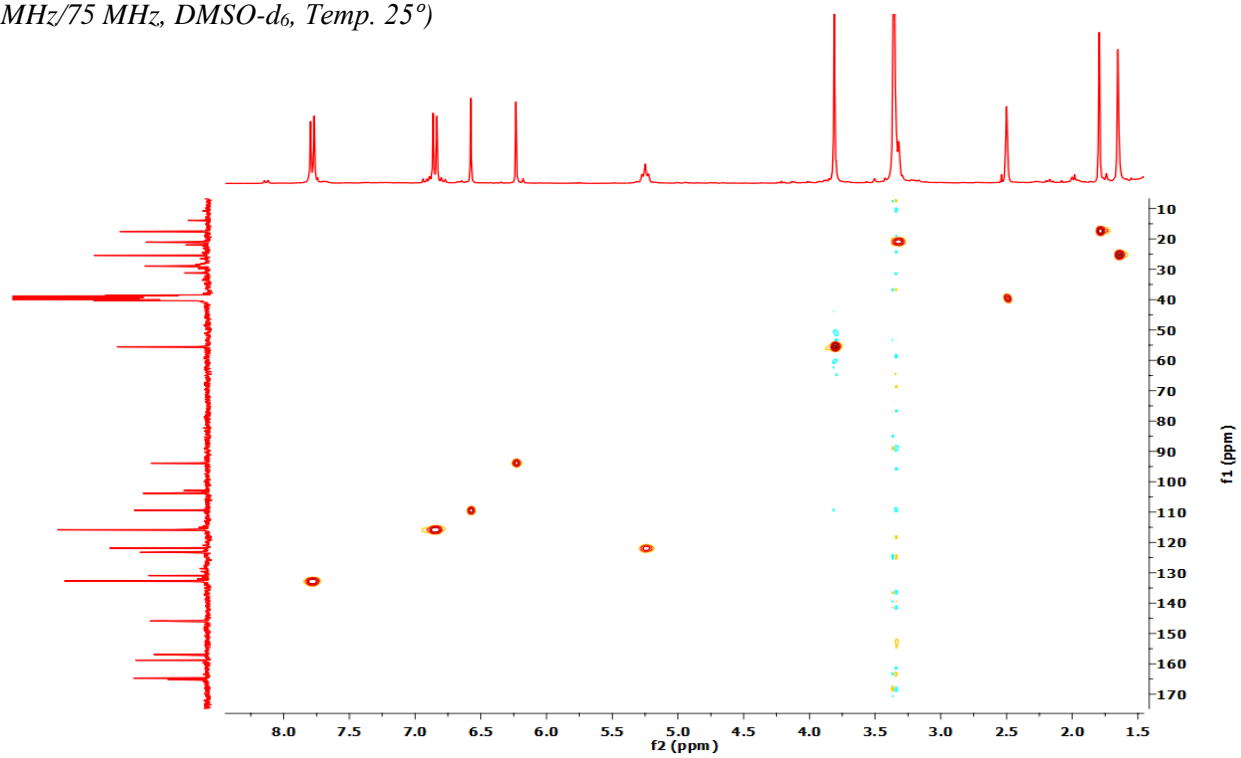

**Figure S10.** UV spectrum of  $\alpha,\beta$ -dihydroxanthohumol 4'-O- $\beta$ -D-glucopyranoside (**6**) (MeOH, Temp. 20 °C)

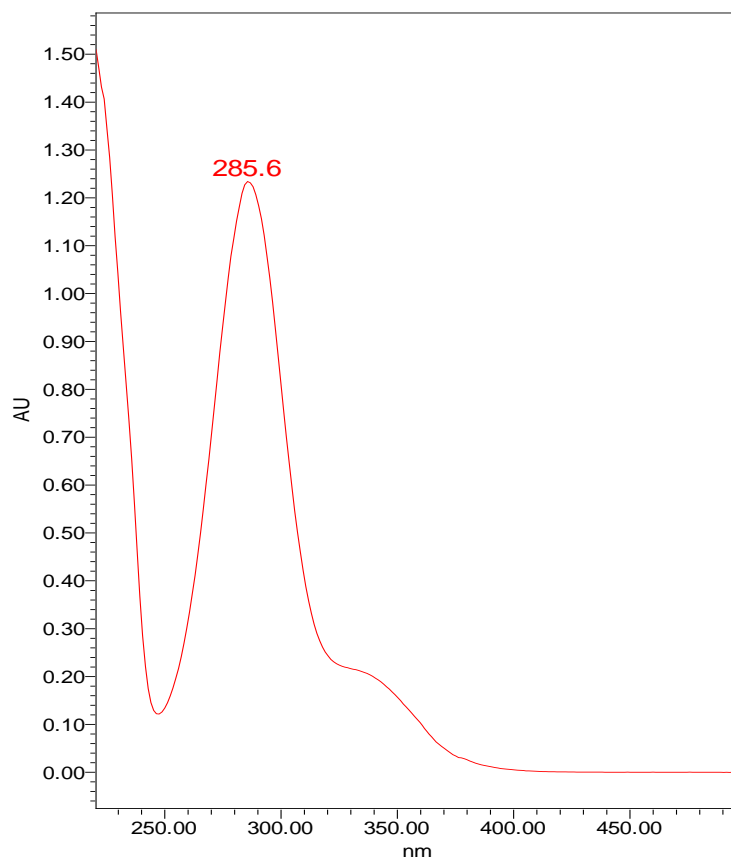

**Figure S11.** HRMS spectrum of  $\alpha,\beta$ -dihydroxanthohumol 4'-O- $\beta$ -D-glucopyranoside (**6**)

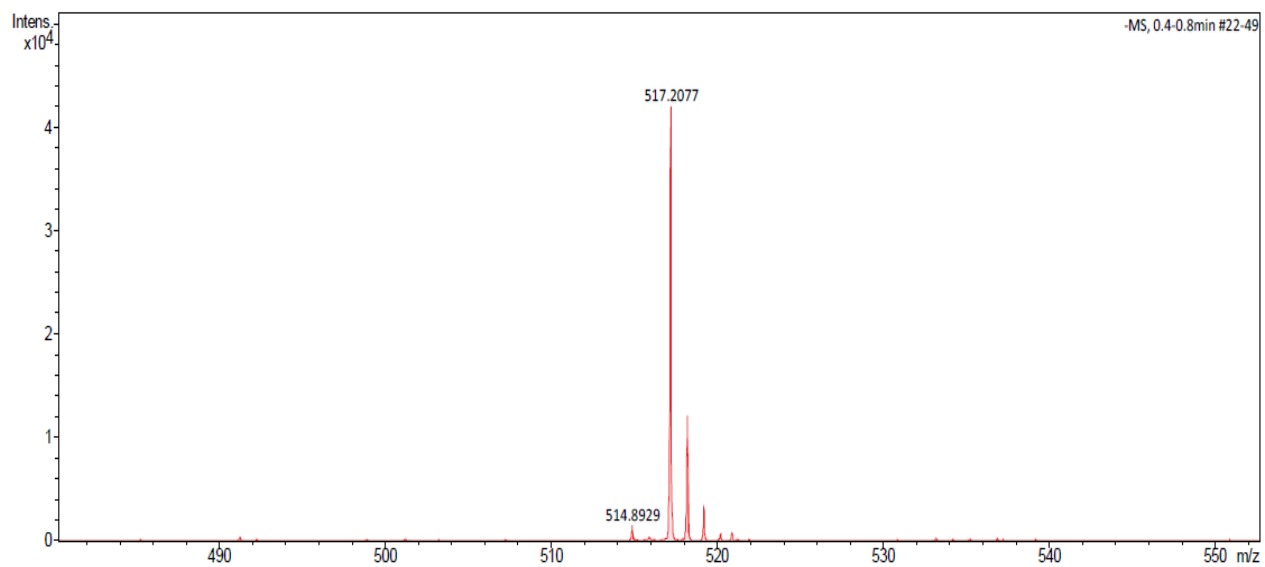



**Figure S12.**  $^1\text{H}$  NMR (600 MHz) and  $^{13}\text{C}$  NMR (151 MHz) spectra of  $\alpha,\beta$ -dihydroxanthohumol 7-O- $\beta$ -D-glucopyranoside (**6**) (Acetone- $d_6$ , Temp. 25 °C)

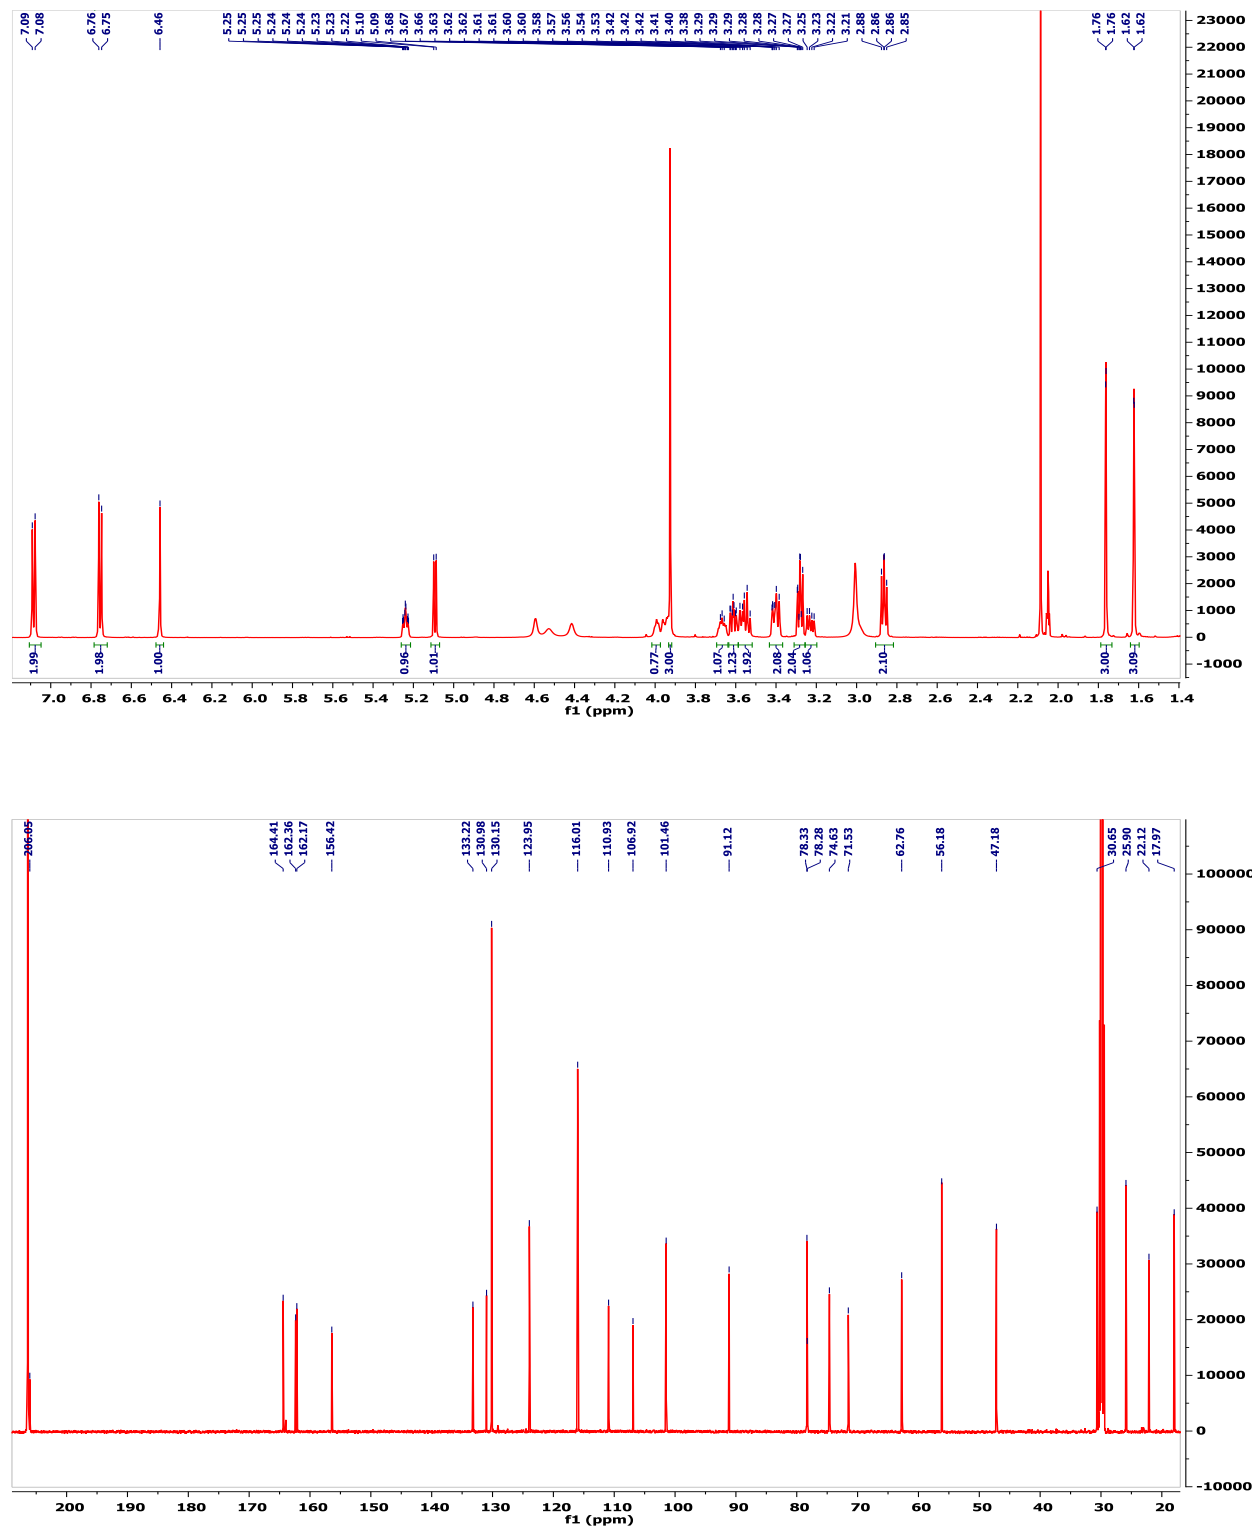

**Figure S13.**  $^1\text{H NMR} - ^1\text{H NMR (COSY)}$  spectrum of  $\alpha,\beta$ -dihydroxanthohumol 7-O- $\beta$ -D-glucopyranoside (**6**) (600 MHz/600 MHz, Acetone- $d_6$ , Temp. 25 $^\circ$ )

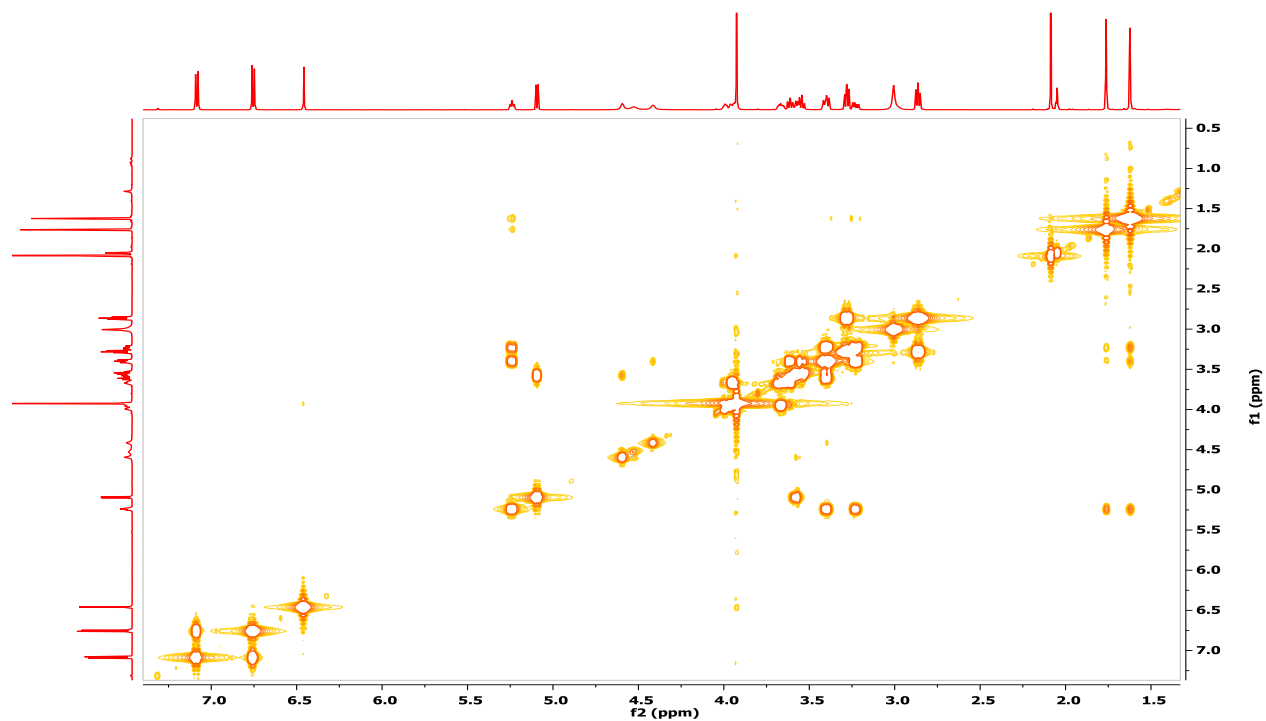

**Figure S14.**  $^1\text{H NMR} - ^{13}\text{C NMR (HSQC)}$  spectrum of  $\alpha,\beta$ -dihydroxanthohumol 7-O- $\beta$ -D-glucopyranoside (**6**) (600 MHz/151 MHz, Acetone- $d_6$ , Temp. 25 $^\circ$ )

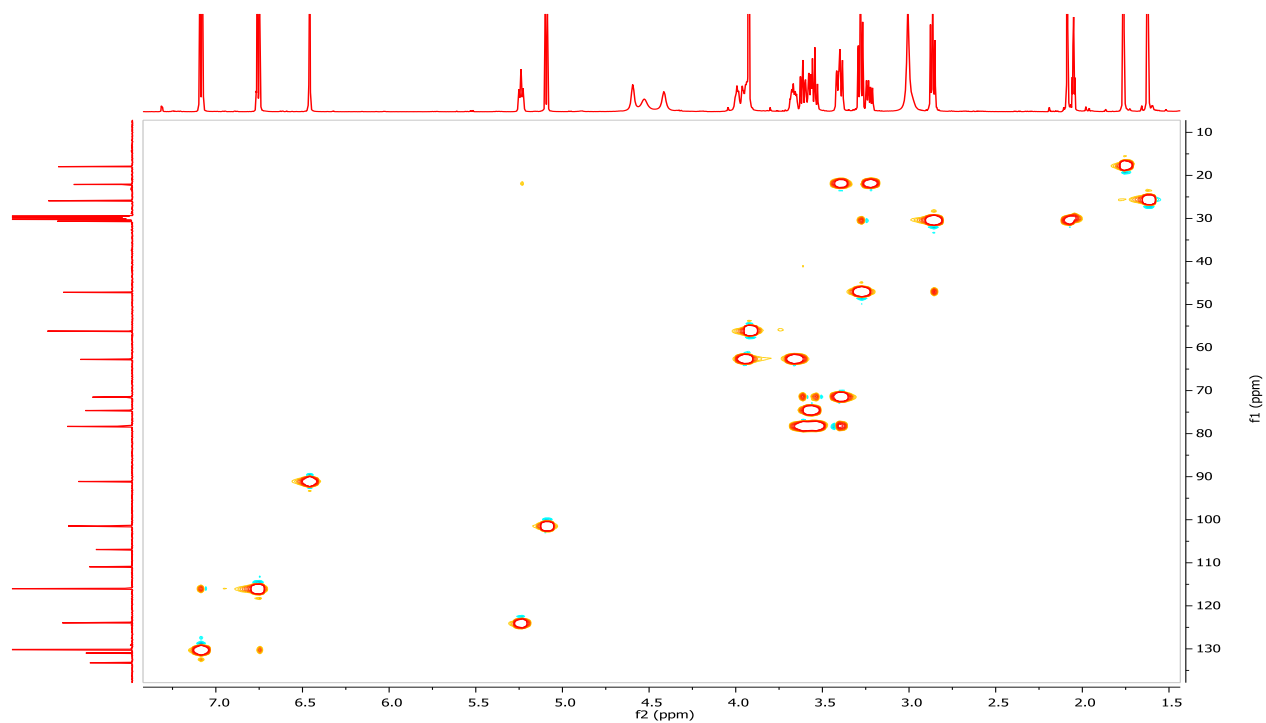

**Figure S15.** UV spectrum of  $\alpha,\beta$ -dihydroxanthohumol 7-O- $\beta$ -D-(4'''-O-methyl)glucopyranoside (7) (MeOH, Temp. 20 °C)

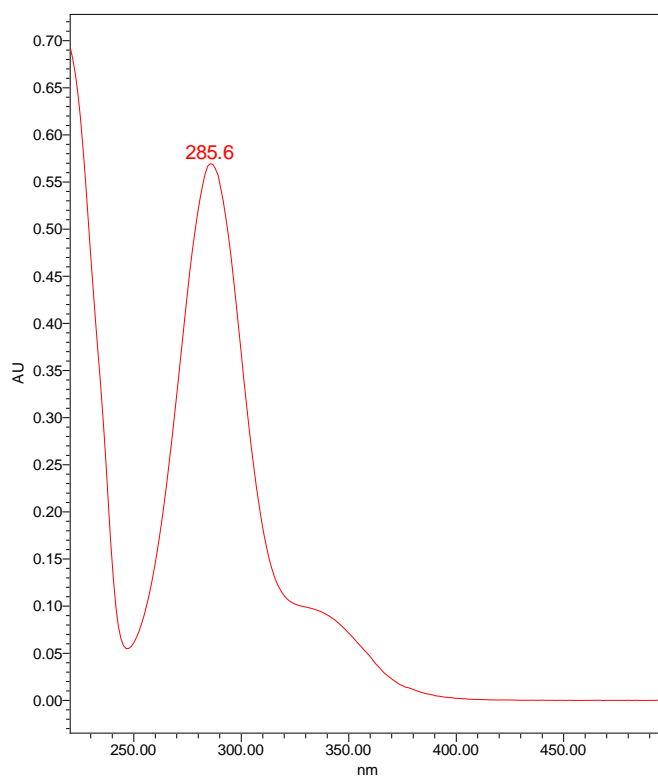

**Figure S16.** HRMS spectrum of  $\alpha,\beta$ -dihydroxanthohumol 7-O- $\beta$ -D-(4'''-O-methyl)glucopyranoside (7)

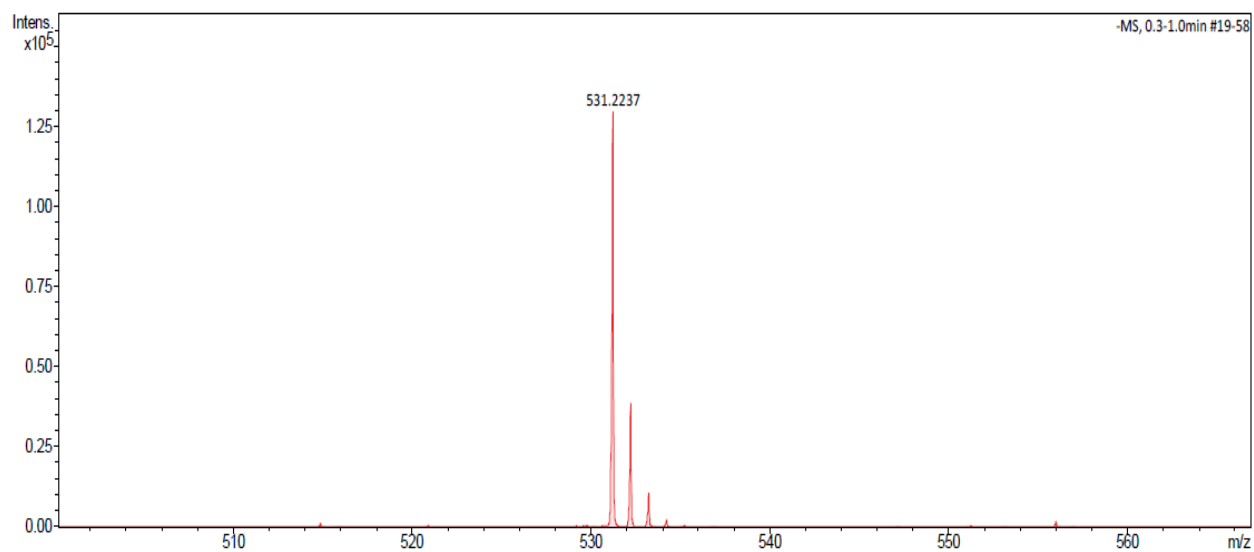

**Figure S17.**  $^1\text{H}$  NMR (600 MHz) and  $^{13}\text{C}$  NMR (151 MHz) spectra of  $\alpha,\beta$ -dihydroxanthohumol 7- $O$ - $\beta$ -D-(4''- $O$ -methyl)glucopyranoside (**7**) (Acetone- $d_6$ , Temp. 25  $^\circ\text{C}$ ).

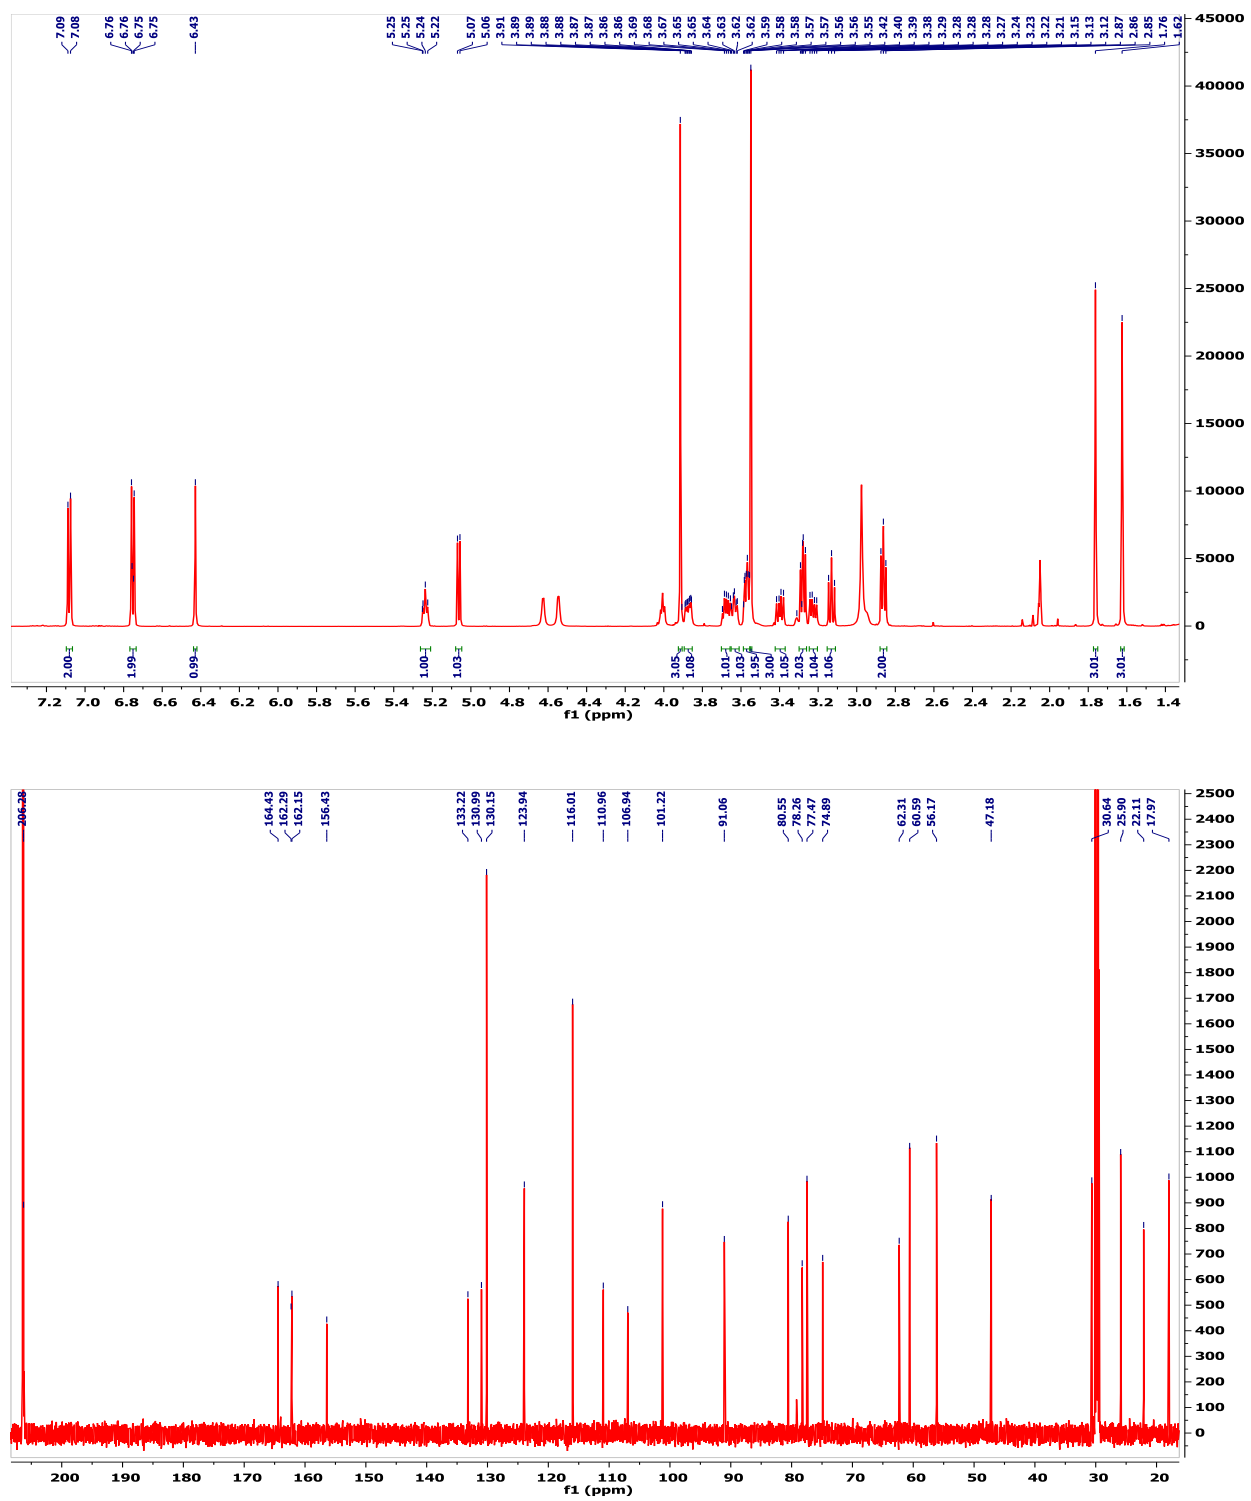

**Figure S18.**  $^1\text{H NMR} - ^1\text{H NMR (COSY)}$  spectrum of  $\alpha,\beta$ -dihydroxanthohumol 7-O- $\beta$ -D-(4'''-O-methyl)glucopyranoside (**7**) (600 MHz/600 MHz, Acetone- $d_6$ , Temp. 25 $^\circ$ )

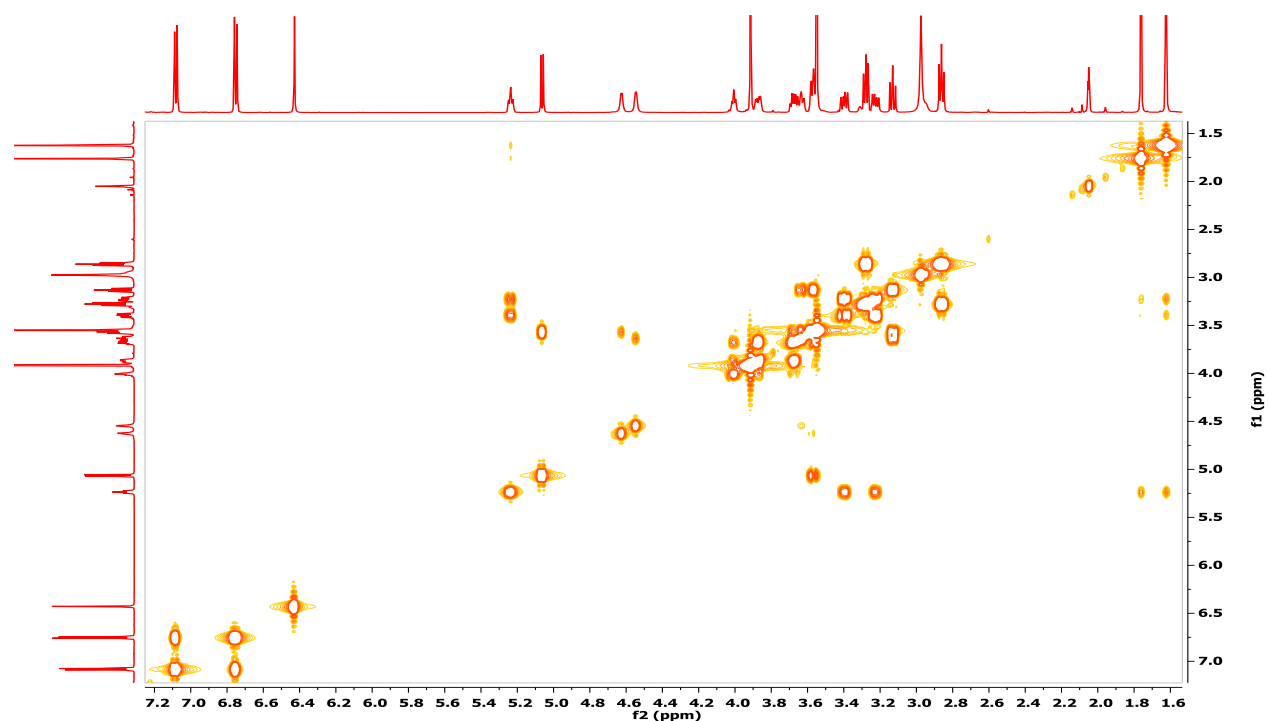

**Figure S19.**  $^1\text{H NMR} - ^{13}\text{C NMR (HSQC)}$  spectrum of  $\alpha,\beta$ -dihydroxanthohumol 7-O- $\beta$ -D-(4'''-O-methyl)glucopyranoside (**7**) (600 MHz/151 MHz, Acetone- $d_6$ , Temp. 25 $^\circ$ )

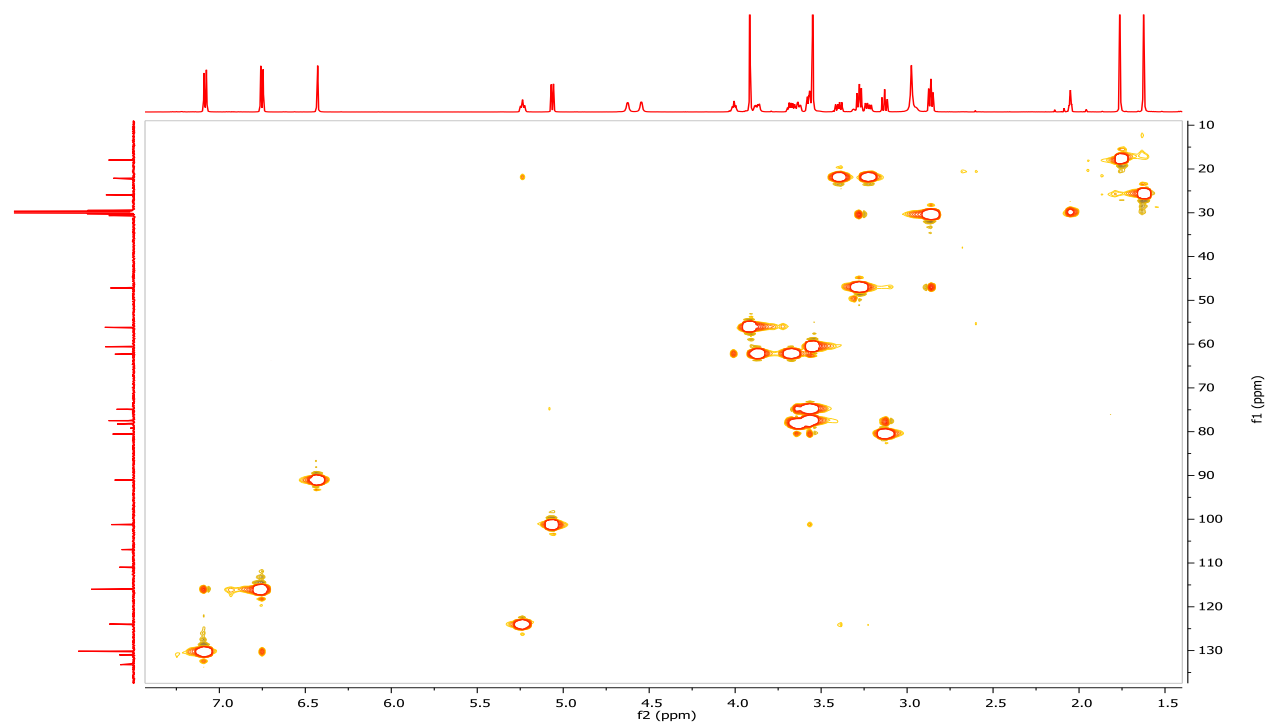

**Figure S20.** UV spectrum of (Z)-6,4'-dihydroxy-4-methoxy-7-prenylaurone 6-O- $\beta$ -D-glucopyranoside (**8**) (MeOH, Temp. 20 °C)

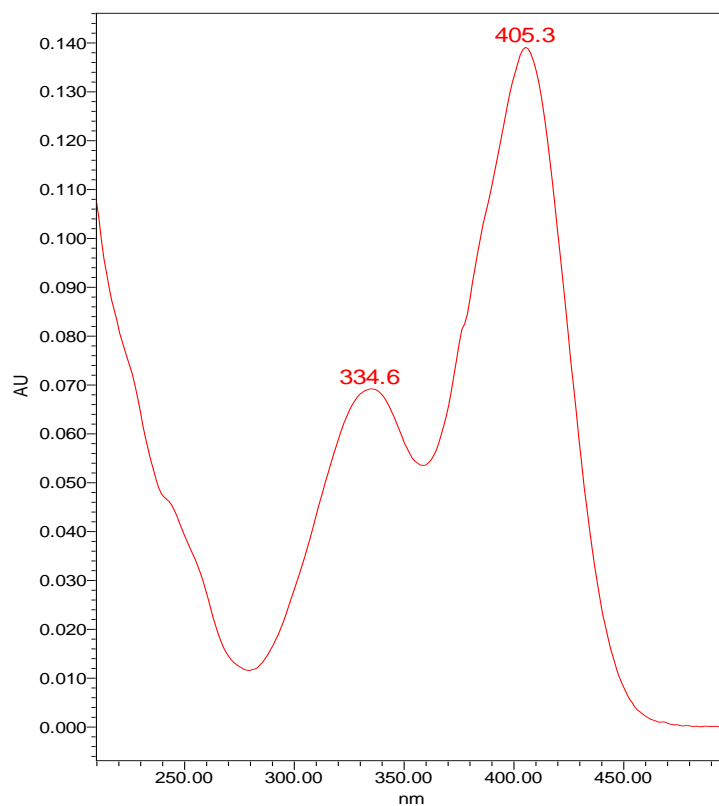

**Figure S21.** HRMS spectrum of (Z)-6,4'-dihydroxy-4-methoxy-7-prenylaurone 6-O- $\beta$ -D-glucopyranoside (**8**)

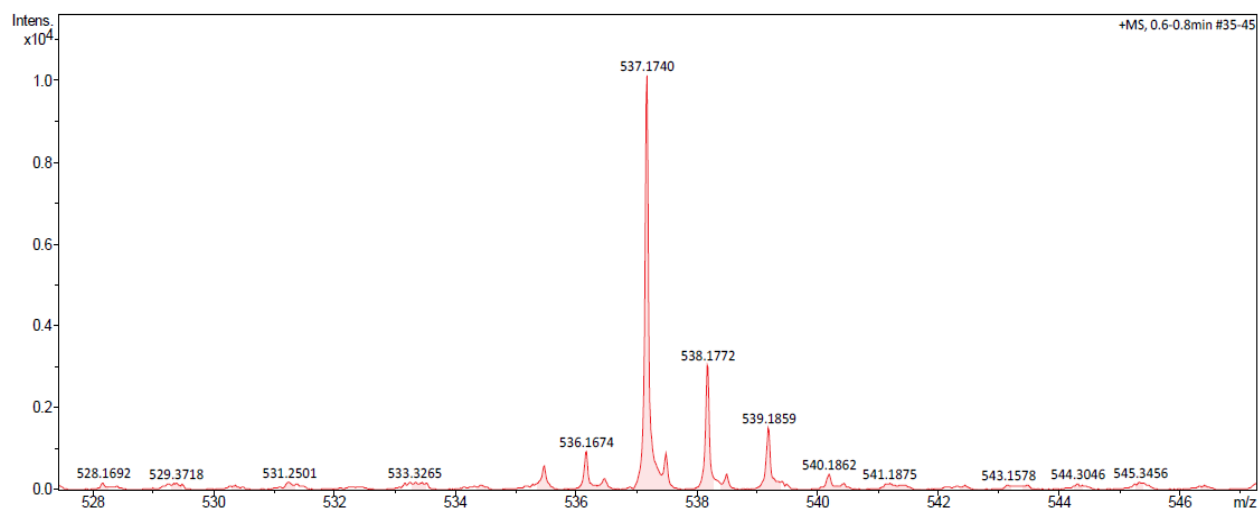

**Figure S22.**  $^1\text{H}$  NMR (600 MHz) and  $^{13}\text{C}$  NMR (151 MHz) spectra of (Z)-6,4'-dihydroxy-4-methoxy-7-prenylaurone 6-O- $\beta$ -D-glucopyranoside (**8**)  $\text{CD}_3\text{OD}$ , Temp. 25  $^\circ\text{C}$

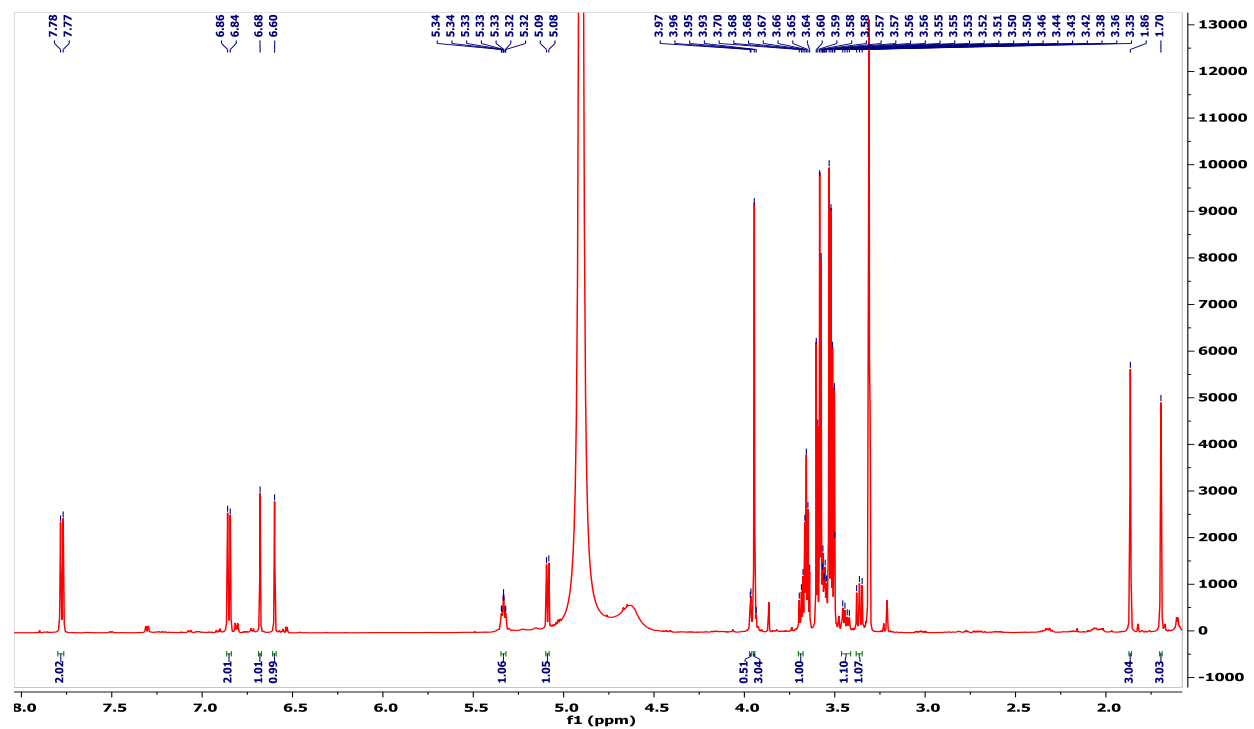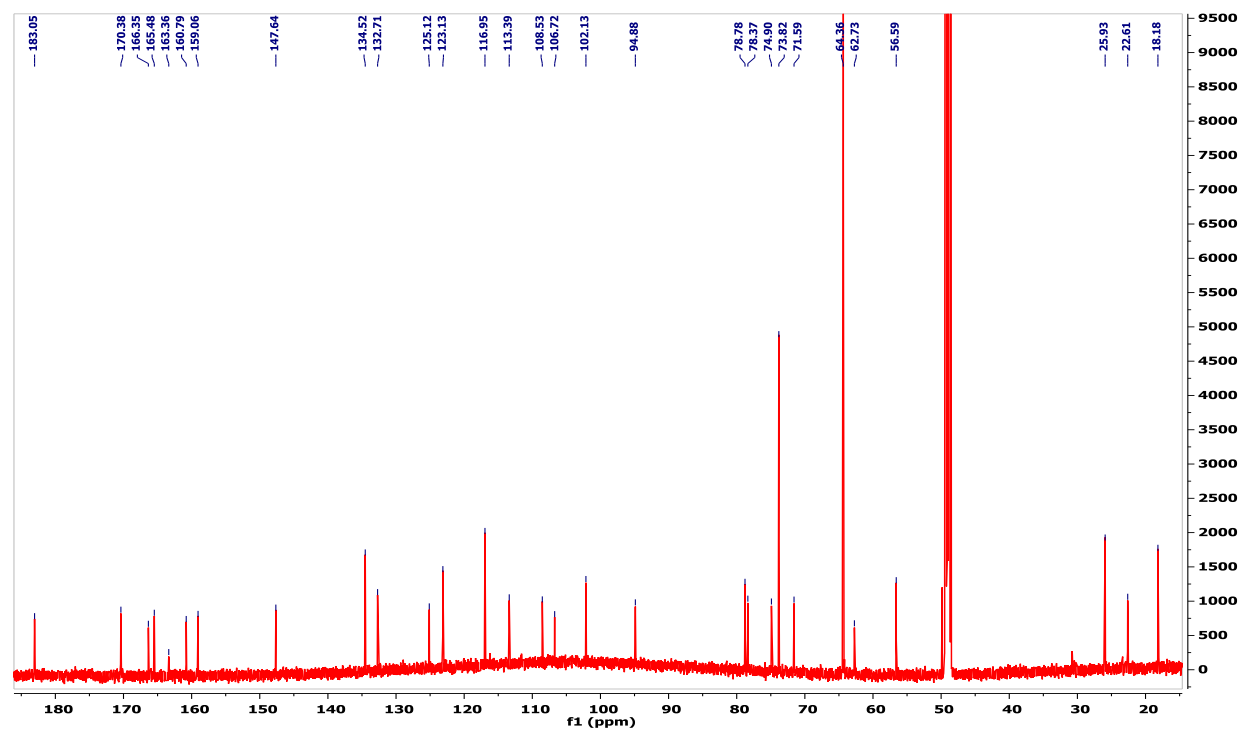

**Figure S23.**  $^1\text{H}$  NMR -  $^1\text{H}$  NMR (COSY) spectrum of (Z)-6,4'-dihydroxy-4-methoxy-7-prenylaurone 6-O- $\beta$ -D-glucopyranoside (**8**) (600 MHz/600 MHz,  $\text{CD}_3\text{OD}$ , Temp. 25  $^\circ\text{C}$ )

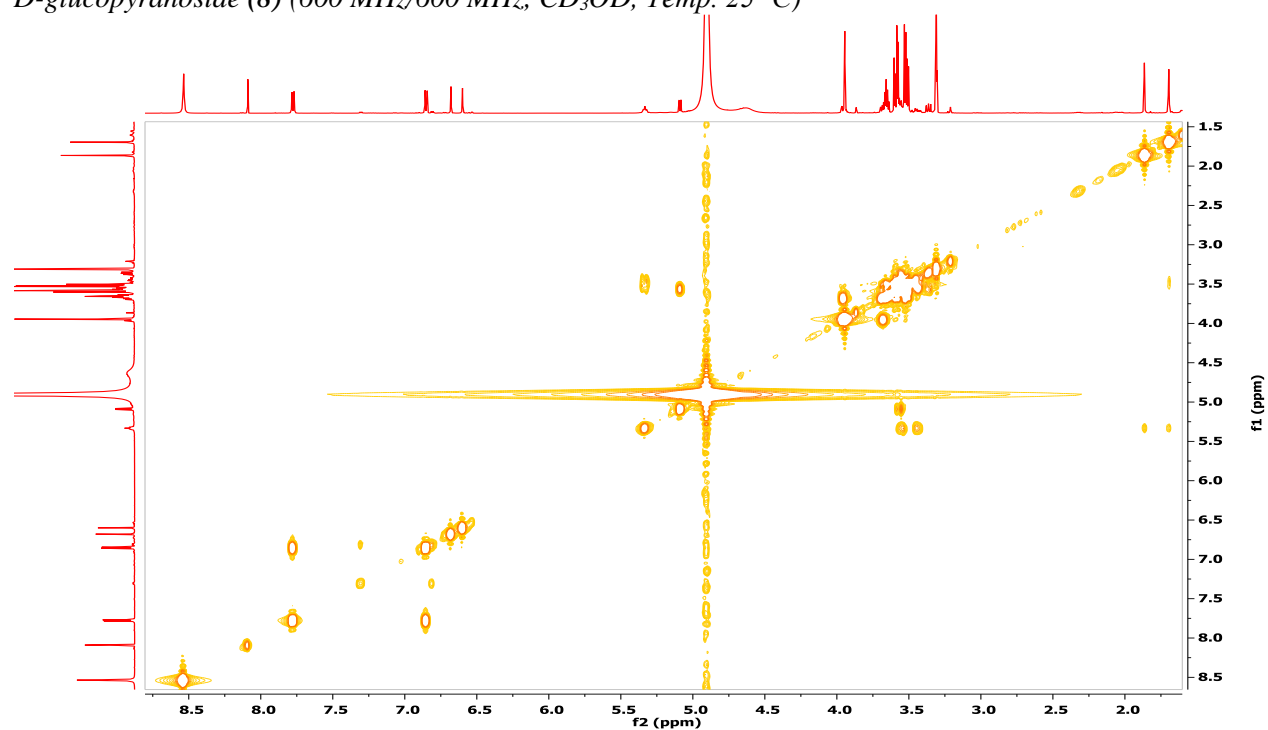

**Figure S24.**  $^1\text{H}$  NMR -  $^{13}\text{C}$  NMR (HSQC) spectrum of (Z)-6,4'-dihydroxy-4-methoxy-7-prenylaurone 6-O- $\beta$ -D-glucopyranoside (**8**) (600 MHz/151 MHz,  $\text{CD}_3\text{OD}$ , Temp. 25  $^\circ\text{C}$ )

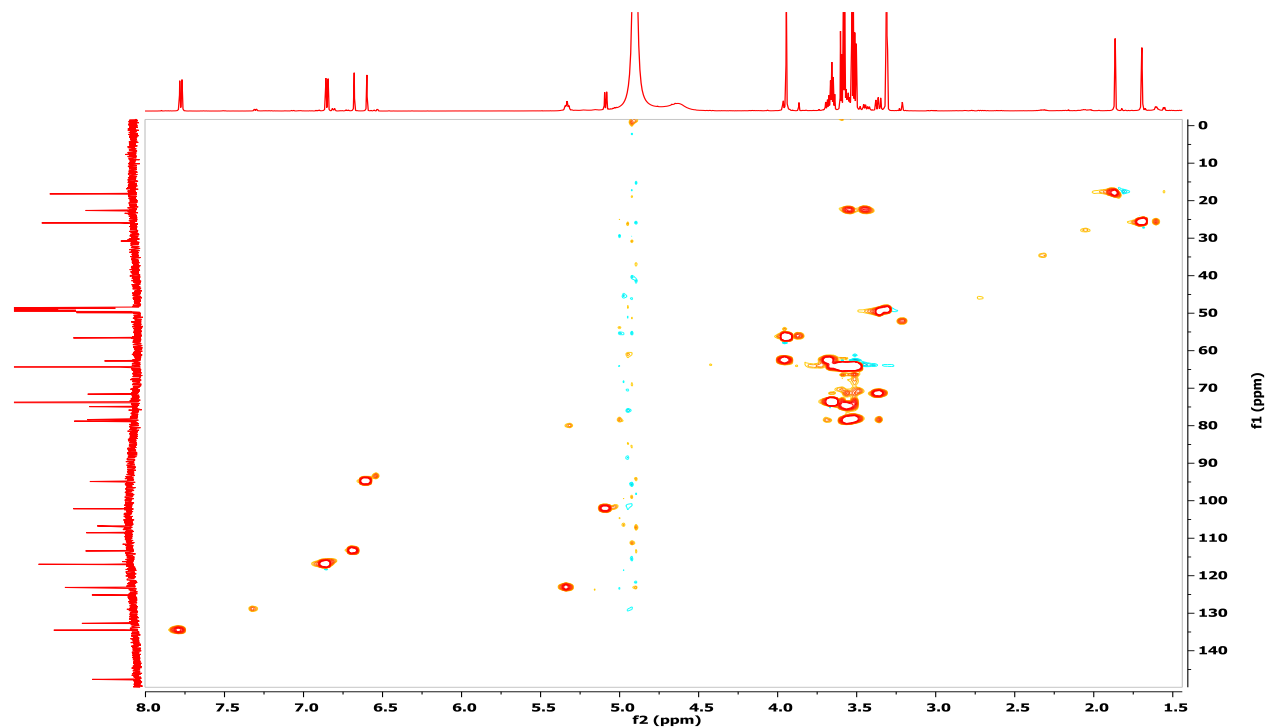



**Figure S25.** UV spectrum of (Z)-6,4'-dihydroxy-4-methoxy-7-prenylaurone 6-O- $\beta$ -D-(4'''-O-methyl)glucopyranoside (**9**)(MeOH, Temp. 20 °C)

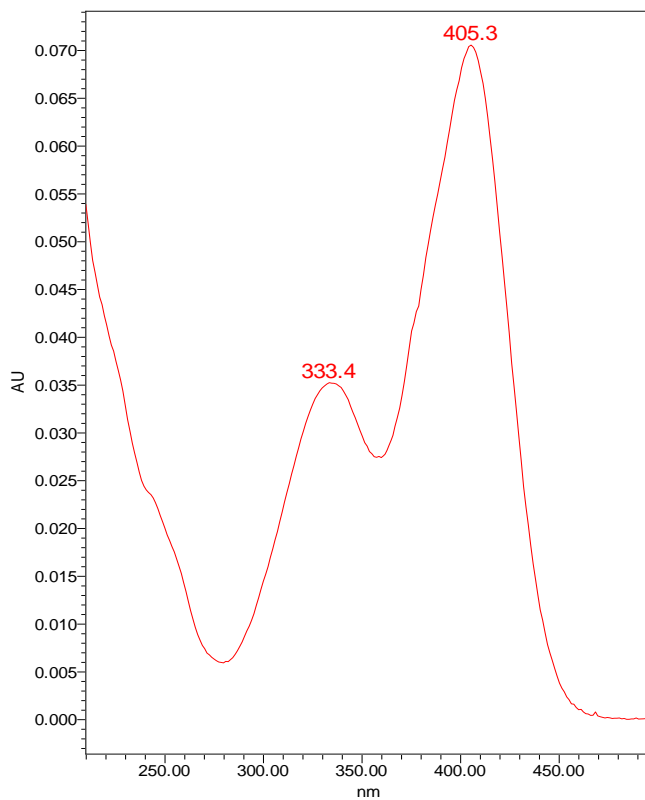

**Figure S26.** HRMS spectrum of (Z)-6,4'-dihydroxy-4-methoxy-7-prenylaurone 6-O- $\beta$ -D-(4'''-O-methyl)glucopyranoside (**9**)

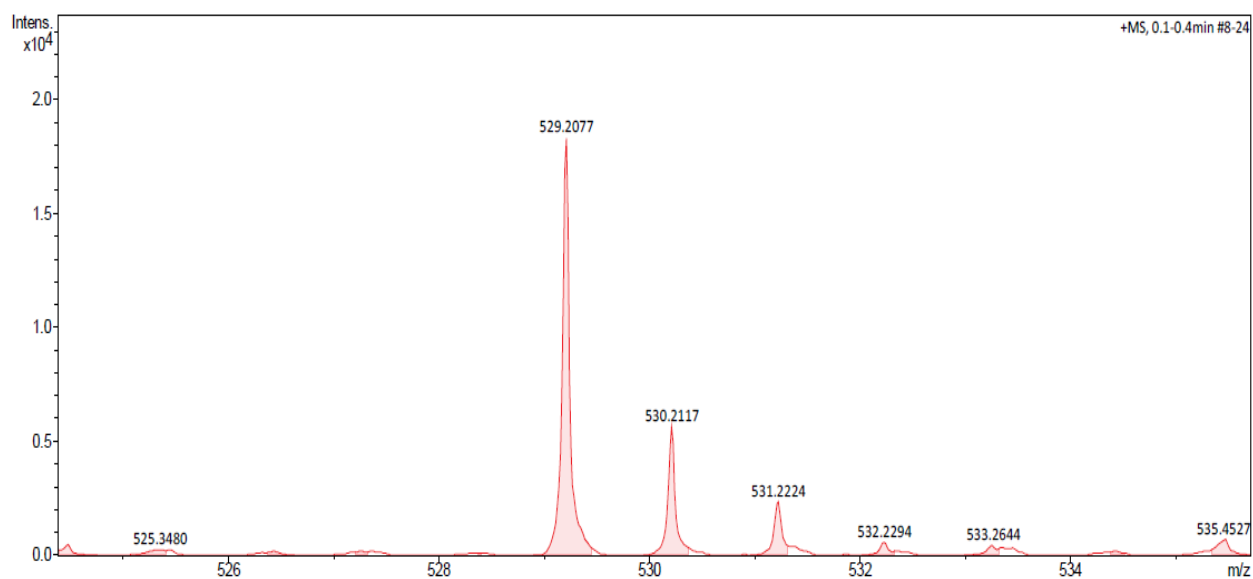

**Figure S27.**  $^1\text{H}$  NMR (300 MHz) and  $^{13}\text{C}$  NMR (75 MHz,) spectra of (Z)-6,4'-dihydroxy-4-methoxy-7-prenylaurone 6-O- $\beta$ -D-(4'''-O-methyl)glucopyranoside (**9**) (DMSO- $d_6$ , Temp. 25  $^\circ\text{C}$ )

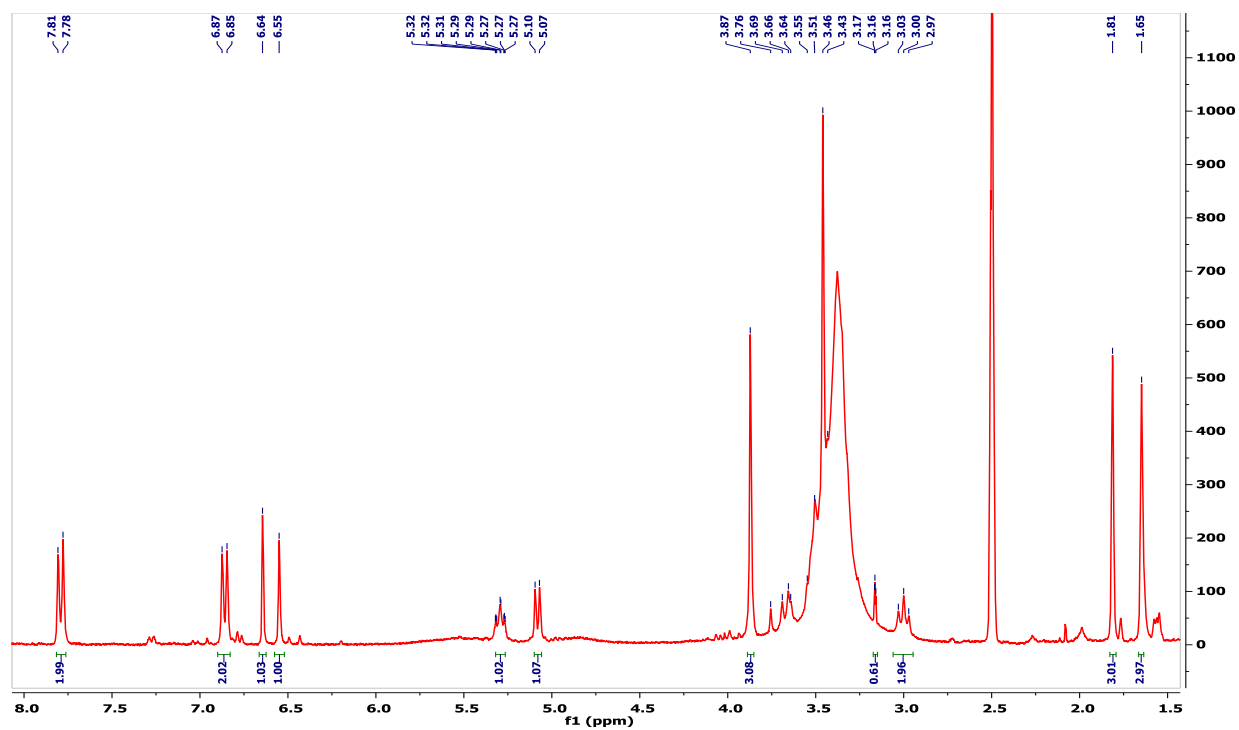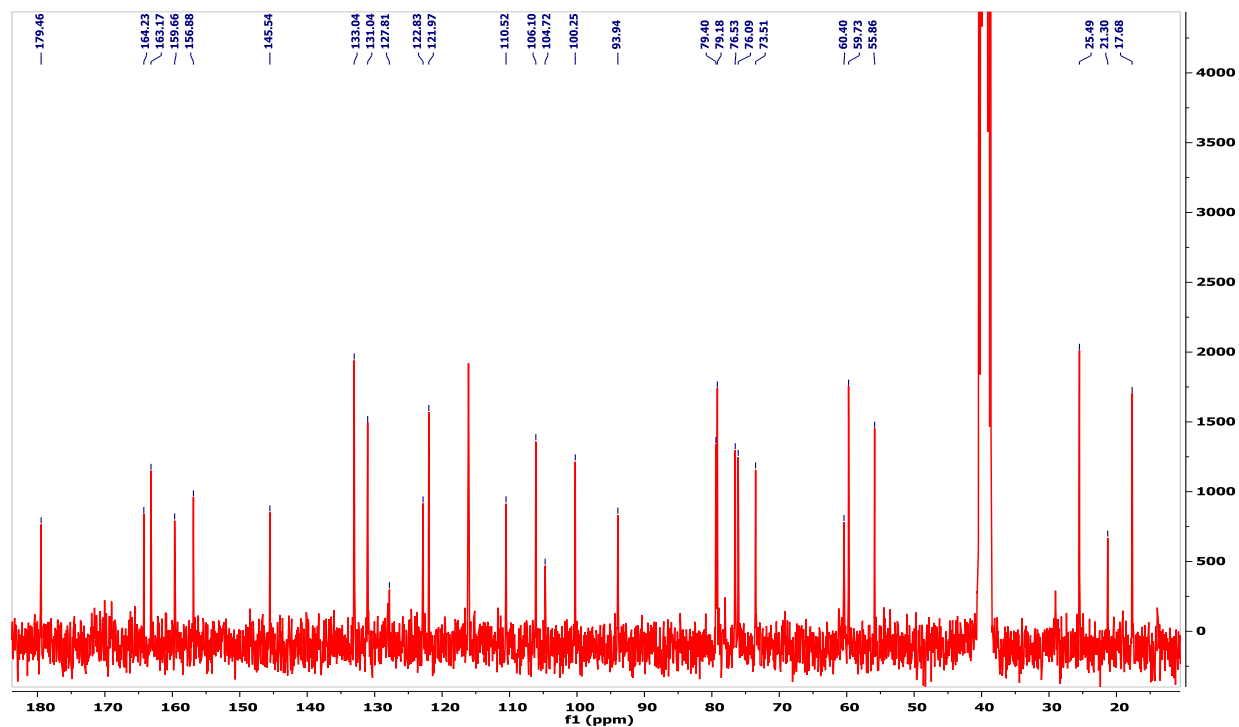

**Figure S28.**  $^1\text{H NMR} - ^1\text{H NMR}$  (COSY) spectrum of (Z)-6,4'-dihydroxy-4-methoxy-7-prenylaurone 6-O- $\beta$ -D-(4'''-O-methyl)glucopyranoside (**9**) (600 MHz/600 MHz, DMSO- $d_6$ , Temp. 25  $^\circ\text{C}$ )

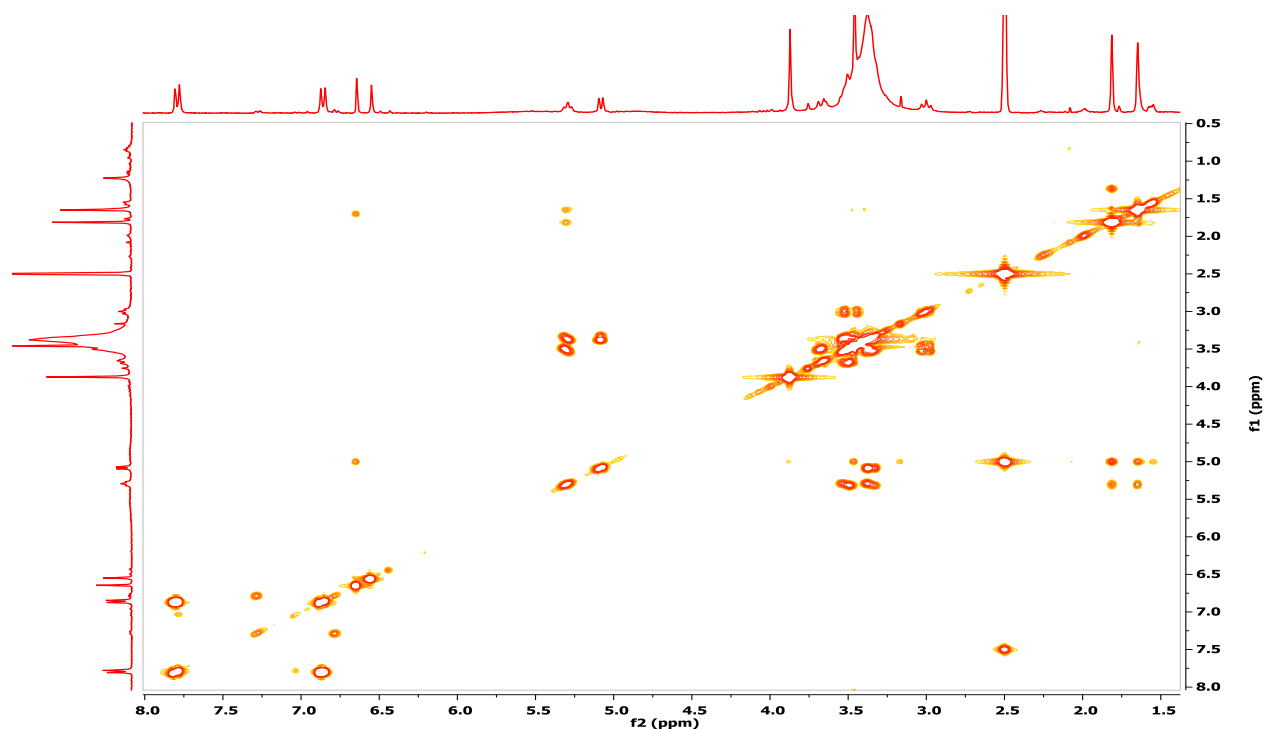

**Figure S29.**  $^1\text{H NMR} - ^{13}\text{C NMR}$  (HSQC) spectrum of (Z)-6,4'-dihydroxy-4-methoxy-7-prenylaurone 6-O- $\beta$ -D-(4'''-O-methyl)glucopyranoside (**9**) (600 MHz/151 MHz, DMSO- $d_6$ , Temp. 25  $^\circ\text{C}$ )

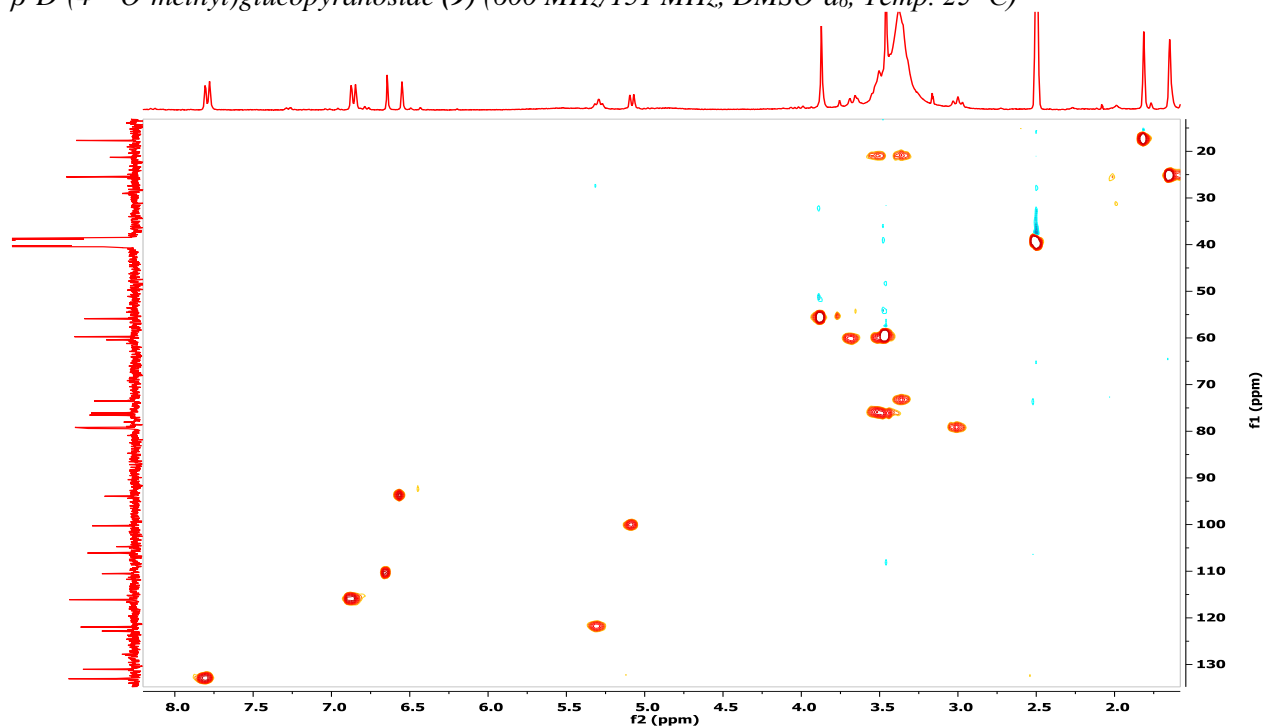

Supplement: molecules-22-01230-s001.pdf [file molecules-22-01230-s001.pdf]
